# Supplementary material for: Human Health, Economic and Environmental Assessment of Onsite Non-Potable Water Reuse Systems for a Large, Mixed-Use Urban Building
Source: PubMed Central journal article supplement (PMC7490829; doi:10.3390/su12135459), 2020-07-07
Supplement: NIHMS1622225-supplement-Supp_Info.pdf [file NIHMS1622225-supplement-Supp_Info.pdf]

1 Supplemental Material: Human health, economic and environmental  
 2 assessment of onsite non-potable reuse systems for a large, mixed use  
 3 urban building

4 Sam Arden<sup>1</sup>, Ben Morelli<sup>1</sup>, Mary Schoen<sup>2</sup>, Sarah Cashman<sup>1</sup>, Michael Jahne<sup>3</sup>, Cissy Ma<sup>3\*</sup>, Jay Garland<sup>3</sup>

5 <sup>1</sup>Eastern Research Group, Lexington, Massachusetts USA

6 <sup>2</sup>Soller Environmental, Berkeley, California, USA

7 <sup>3</sup>United States Environmental Protection Agency, Center for Environmental Solutions and Emergency Response,  
 8 Cincinnati, Ohio USA

10 S1. Treatment System Design and Inventory Development

11 Life cycle inventories (LCI) were developed for each treatment configuration based on the designs  
 12 necessary to achieve the desired effluent water quality discussed in the main document. This  
 13 supplementary information section provides additional detail as to the specific design details of individual  
 14 treatment system unit process. It is intended to support the overview provided in Section 2.1 of the main  
 15 text. Table S1 [1] provides the physical/chemical water quality parameters assumed for mixed wastewater  
 16 and source-separated graywater, as well as applicable effluent quality guidelines. The remainder of the  
 17 section discusses the selection process and specific design details for individual unit processes.

18 Table S1. Wastewater Influent Characteristics and Target Effluent Quality for Unrestricted Urban Reuse

| Water Quality Characteristics |        | Influent Values |                                 | Target Effluent Quality                     |
|-------------------------------|--------|-----------------|---------------------------------|---------------------------------------------|
|                               |        | Mixed WW        | Graywater                       | Both                                        |
| Characteristic                | Unit   | Medium Strength | Low Pollutant Load with Laundry | Effluent Quality for Unrestricted Urban Use |
| Suspended Solids              | mg/L   | 220             | 94                              | <5                                          |
| Volatile Solids               | %      | 80              | 47                              | -                                           |
| cBOD <sub>5</sub>             | mg/L   | 200             | 170                             | -                                           |
| BOD <sub>5</sub>              | mg/L   | 240             | 190                             | <10                                         |
| COD                           | mg/L   | 510             | 330                             | -                                           |
| TKN                           | mg N/L | 35              | 8.5                             | -                                           |
| Ammonia                       | mg N/L | 20              | 1.9                             | -                                           |
| Nitrite                       | mg N/L | -               | -                               | -                                           |
| Nitrate                       | mg N/L | -               | 0.64                            | -                                           |
| Total Phosphorus              | mg P/L | 5.6             | 1.1                             | -                                           |
| Chlorine Residual             | mg/L   | -               | -                               | 0.5-2.5                                     |

19 Table Acronyms: BOD – biochemical oxygen demand, cBOD- carbonaceous biochemical oxygen demand, COD –  
 20 chemical oxygen demand

21 S1.1 Unit Process Selection to Achieve LRTs

22 Disinfection processes were specified for each of the wastewater treatment systems based on log  
 23 reduction targets (LRTs) intended to achieve a risk level of 1 in 10,000 infections per person per year (ppy)

24 considering several reuse applications. Log reduction values (LRVs) vary based on organism type,  
 25 disinfection method, and applied dose as specified in Table S2. Biological processes also provide some level  
 26 of treatment, which was taken into account when selecting disinfection unit processes so that the total  
 27 (additive) LRT could be achieved. Table S3 shows LRVs assigned to individual biological and disinfection  
 28 processes included in the study systems, and the corresponding disinfection dose.

29 Both MBR treatment processes were assigned a LRV of five for each pathogen class, which is  
 30 conservative based on the LRV of six or more reported by [2]. Based on a lack of available data for the  
 31 RVFW specifically, it was assigned LRVs for wetlands from Sharvelle et al. (2017), varying between 0.5 and  
 32 1 depending on organism type.

33 Most systems only require chlorine and ultraviolet (UV) disinfection processes to meet LRTs for non-  
 34 potable reuse. Chlorination is legally required for all non-potable reuse systems, in order to maintain a free  
 35 chlorine residual of 1 mg/L [2].

36 The RVFW treating mixed wastewater requires a third disinfection process, ozone, to meet the LRTs  
 37 for viruses and protozoa.

38 Table S2. Log Reduction Values for Biological and Disinfection Processes (Sharvelle et al., 2017).

|                                        |                     | Enteric Viruses | Parasitic Protozoa | Enteric Bacteria | Units              |
|----------------------------------------|---------------------|-----------------|--------------------|------------------|--------------------|
| <b>Membrane Bioreactor<sup>a</sup></b> | Log Reduction       | 5               | 5                  | 5                | log                |
| <b>Wetland</b>                         |                     | 0.5             | 1                  | 0.8              | log                |
| <b>Free Chlorine</b>                   | 1 Log <sub>10</sub> | n/a             | 2000-2600          | 0.4-0.6          | mg-min/L           |
|                                        | 2 Log <sub>10</sub> | 1.5-1.8         | n/a                | 0.8-1.2          | mg-min/L           |
|                                        | 3 Log <sub>10</sub> | 2.2-2.6         | n/a                | 1.2-1.8          | mg-min/L           |
|                                        | 4 Log <sub>10</sub> | 3-3.5           | n/a                | 1.6-2.4          | mg-min/L           |
| <b>Ozone</b>                           | 1 Log <sub>10</sub> | n/a             | 4-4.5              | 0.005-0.01       | mg-min/L           |
|                                        | 2 Log <sub>10</sub> | 0.25-0.3        | 8-8.5              | 0.01-0.02        | mg-min/L           |
|                                        | 3 Log <sub>10</sub> | 0.35-0.45       | 12-13              | 0.02-0.03        | mg-min/L           |
|                                        | 4 Log <sub>10</sub> | 0.5-0.6         | n/a                | 0.03-0.04        | mg-min/L           |
| <b>UV Radiation</b>                    | 1 Log <sub>10</sub> | 50-60           | 2-3                | 10-15            | mJ/cm <sup>2</sup> |
|                                        | 2 Log <sub>10</sub> | 90-110          | 5-6                | 20-30            | mJ/cm <sup>2</sup> |
|                                        | 3 Log <sub>10</sub> | 140-150         | 11-12              | 30-45            | mJ/cm <sup>2</sup> |
|                                        | 4 Log <sub>10</sub> | 180-200         | 20-25              | 40-60            | mJ/cm <sup>2</sup> |

39 <sup>a</sup> Log reduction values for AeMBRs and AnMBRs are based on the use of ultrafiltration membranes.

Table S3. Log Reduction Values of Selected Wastewater Treatment Processes.

| MBR - mixed WW      | Virus | Protozoa | Bacteria | Dose | Dose Units         |
|---------------------|-------|----------|----------|------|--------------------|
| Technology          | LRV   | LRV      | LRV      |      |                    |
| Membrane bioreactor | 5     | 5        | 5        | n/a  | n/a                |
| Ozone               | -     | -        | -        | -    | -                  |
| UV                  | 0     | 4        | 2        | 30   | mJ/cm <sup>2</sup> |
| Chlorination        | 4     | 0        | 4        | 32   | mg-min/L           |
| Total System LRV    | 9     | 9        | 11       |      |                    |
| MBR - graywater     | Virus | Protozoa | Bacteria | Dose | Dose Units         |
| Technology          | LRV   | LRV      | LRV      |      |                    |
| Membrane bioreactor | 5     | 5        | 5        | n/a  | n/a                |
| Ozone               | -     | -        | -        | -    | -                  |
| UV                  | 0     | 4        | 2        | 30   | mJ/cm <sup>2</sup> |
| Chlorination        | 4     | 0        | 4        | 32   | mg-min/L           |
| Total System LRV    | 9     | 9        | 11       |      |                    |
| RVFW - mixed WW     | Virus | Protozoa | Bacteria | Dose | Dose Units         |
| Technology          | LRV   | LRV      | LRV      |      |                    |
| RVFW                | 0.5   | 1        | 0.8      | n/a  | n/a                |
| Ozone               | 4     | 2        | 4        | 8.3  | mg-min/L           |
| UV                  | 1     | 4        | 4        | 55   | mJ/cm <sup>2</sup> |
| Chlorination        | 4     | 0        | 4        | 32   | mg-min/L           |
| Total System LRV    | 9.5   | 7        | 12.8     |      |                    |
| RVFW - graywater    | Virus | Protozoa | Bacteria | Dose | Dose Units         |
| Technology          | LRV   | LRV      | LRV      |      |                    |
| RVFW                | 0.5   | 1        | 0.8      | n/a  | n/a                |
| Ozone               | -     | -        | -        | -    | mg-min/L           |
| UV                  | 2     | 4        | 4        | 95   | mJ/cm <sup>2</sup> |
| Chlorination        | 4     | 0        | 4        | 32   | mg-min/L           |
| Total System LRV    | 6.5   | 5        | 8.8      |      |                    |

43 S1.2 Pre-treatment

44 Each of the three treatment systems utilize a fine screen and equalization chamber for pre-treatment.  
 45 The fine screen removes large particles and debris from influent that could damage or impede operation of  
 46 the biological treatment units. Screenings are disposed of in a municipal solid waste landfill. A slant plate  
 47 clarifier also precedes the RVFW to prevent unnecessary clogging of the media beds. Equalization  
 48 chambers were sized to dampen fluctuation in hourly wastewater generation within the building. The LCI  
 49 of these three processes includes electricity use and basic infrastructure materials (steel, concrete, and  
 50 piping).

51 S1.3 Aerobic membrane bioreactor

52 The AeMBR combines a continuously-stirred aerobic reactor with a submerged membrane filter for  
 53 solids separation. Solids are pumped from the reactor and disposed of in the sanitary sewer, where they  
 54 are treated with the rest of the municipal waste stream.

55 Table S4 presents basic design values for the mixed wastewater and graywater AeMBR treatment  
 56 processes. LCI electricity consumption accounts for aeration energy demand to provide both biological  
 57 process aeration and membrane cleaning, permeate pumping, sludge pumping, and miscellaneous  
 58 additional uses. The membrane is made out of polyvinyl fluoride and was sized based on the wastewater  
 59 flowrate and the design membrane flux of 20 liters per m<sup>2</sup> per hour (LMH). The analysis assumes a  
 60 membrane lifespan of ten years [3]. Inputs of concrete and steel for tank construction were estimated based  
 61 on the presented unit dimensions. Sodium hypochlorite is used for membrane cleaning and was estimated  
 62 assuming that 950 liters of 12.5% NaOCl are used annually per 1,650 m<sup>2</sup> of membrane area [4].

Table S4. AeMBR Design Values

| Parameter                                  | Mixed Wastewater | Graywater | Units                |
|--------------------------------------------|------------------|-----------|----------------------|
| Solids Retention Time <sup>a</sup>         | 15               |           | days                 |
| Hydraulic Retention Time <sup>a</sup>      | 5                |           | hours                |
| Mixed Liquor Suspended Solids <sup>b</sup> | 12,000           | 11,000    | mg/L                 |
| Dissolved Oxygen Setpoint                  | 2                |           | mg O <sub>2</sub> /L |
| Membrane flux                              | 20               |           | LMH                  |
| Backflush flux <sup>c</sup>                | 40               |           | LMH                  |
| Membrane area, operation                   | 200              | 130       | m <sup>2</sup>       |
| Membrane area, total                       | 300              | 190       | m <sup>2</sup>       |
| Tank depth, operational                    | 2.7              | 2.7       | m                    |
| Tank length                                | 3.3              | 2.1       | m                    |
| Tank width <sup>d</sup>                    | 1.1              | 1.1       | m                    |
| Tank volume, operational                   | 20               | 13        | m <sup>3</sup>       |
| Physical cleaning interval <sup>e</sup>    | 10               |           | minutes              |
| Physical cleaning duration <sup>e</sup>    | 45               |           | seconds              |
| Chemical cleaning interval <sup>e</sup>    | 84               |           | hours                |

63 <sup>a</sup> [5]

64 <sup>b</sup> Output of GPS-X model, dependent on selected SRT.

65 <sup>c</sup> Twice membrane flux [5].

66 <sup>d</sup> Tank width refers to individual tank. AeMBR consists of three parallel tanks.

67 <sup>e</sup> [6]

68 Table Acronyms: LMH – liters per m<sup>2</sup> per hour

69 The LCI includes process greenhouse gas (GHG) emissions of methane and nitrous oxide developed  
 70 using the IPCC Guidelines of National Inventories [7]. Methane and nitrous oxide emissions were  
 71 estimated based on the quantity of BOD and total kjeldahl nitrogen (TKN) entering the AeMBR treatment  
 72 process, respectively. GPS-X™ was used to estimate BOD and TKN concentrations influent to the AeMBR.

73 *S1.4 Anaerobic membrane bioreactor*

74 The AnMBR is a psychrophilic treatment process intended to operate at ambient temperatures,  
 75 eliminating heat demand typical of many anaerobic processes, and producing methane as a beneficial by-  
 76 product that is assumed to be used as an alternative heat source for the building's hot water supply. The  
 77 treatment process includes an anaerobic continuously stirred tank reactor (CSTR) and additional tanks to  
 78 house the submerged membranes. Neither nitrogen or phosphorus are removed from wastewater in  
 79 anaerobic reactors [8]. Therefore, downflow-hanging sponge (DHS) and zeolite adsorption post-treatment  
 80 processes are necessary to ensure that treated effluent meets the criteria for unrestricted urban reuse. The  
 81 DHS reactors recover or destroy methane dissolved in AnMBR permeate and have the additional benefit  
 82 of removing 55% and 73% of COD and BOD remaining the wastewater. A zeolite adsorption system is used  
 83 to remove ammonium from the wastewater to allow establishment of a free chlorine residual without  
 84 excessive sodium NaOCl demand.

85 The AnMBR is a psychrophilic treatment process intended to operate at ambient temperatures,  
 86 eliminating heat demand typical of many anaerobic processes, and producing methane as a beneficial by-  
 87 product. The assumed temperature of influent mixed wastewater and graywater is 23°C and 30°C,  
 88 respectively. Graywater temperature was calculated as the median of values reported in literature reviews  
 89 of graywater treatment and reuse studies [9–12]. The mixed wastewater temperature is typical of medium  
 90 strength domestic wastewater [13]. The treatment process includes an anaerobic continuously stirred tank  
 91 reactor (CSTR) and additional tanks to house the submerged membranes.

92 Table S5 lists basic design and operational parameters of the mixed wastewater and graywater  
 93 AnMBRs. The AnMBR has a 60 day solids retention time (SRT). Dimensions of the CSTR were estimated  
 94 based on the influent flowrate and a hydraulic retention time (HRT) of eight hours. Membrane area and  
 95 material requirements were determined based on wastewater flowrate and the design membrane flux of  
 96 7.5 LMH.

97 Inputs of concrete and steel needed for tank construction were estimated based on the presented unit  
 98 dimensions. Electricity consumption of the AnMBR includes sludge pumping, operation of CSTR mixers,  
 99 permeate pumping, and biogas recirculation (i.e., sparging) for membrane cleaning. The baseline scenario  
 100 models continuous biogas sparging to ensure consistent performance, while intermittent sparging is  
 101 assessed in a sensitivity analysis [14]. Sodium hypochlorite is used for periodic chemical cleaning of the  
 102 membrane, with the same chemical requirement as discussed for the AeMBR.  
 103

Table S5. AnMBR Design Values

| System Component  | Parameter                          | Mixed Wastewater | Graywater | Units                     |
|-------------------|------------------------------------|------------------|-----------|---------------------------|
| Anaerobic Reactor | Solids retention time <sup>a</sup> | 60               |           | days                      |
|                   | Hydraulic retention time           | 8                |           | hours                     |
|                   | Mixed liquor suspended solids      | 12,000           |           | mg/L                      |
|                   | COD/BOD removal                    | 90%              |           | of influent concentration |
|                   | Tank diameter                      | 4                | 3.5       | m                         |
|                   | Tank height                        | 4.8              | 4         | m                         |

Table S5. AnMBR Design Values

| System Component | Parameter                           | Mixed Wastewater | Graywater | Units                |
|------------------|-------------------------------------|------------------|-----------|----------------------|
|                  | Mixing power                        | 0.84             | 0.53      | HP                   |
|                  | Biogas production                   | 14               | 6.3       | m <sup>3</sup> /day  |
|                  | Biogas recirculation <sup>a</sup>   | 120              | 76        | m <sup>3</sup> /hour |
| Membrane Tank    | Flux <sup>a</sup>                   | 7.5              |           | LMH                  |
|                  | Membrane area, operational          | 530              | 340       | m <sup>2</sup>       |
|                  | Membrane area, total                | 790              | 500       | m <sup>2</sup>       |
|                  | Tank depth, per train               | 3.7              |           | m                    |
|                  | Tank length, per train <sup>c</sup> | 0.73             | 0.47      | m                    |
|                  | Tank width, per train <sup>c</sup>  | 2.7              |           | m                    |

104 <sup>a</sup>[15,16]

105 Table Acronyms: BOD – biochemical oxygen demand, COD – chemical oxygen demand, LMH – liters per m<sup>2</sup> per hour

106

107 Anaerobic processes generate methane which is trapped under the floating cover. The LCA quantifies  
 108 the benefit of avoiding natural gas consumption, assuming that generated biogas is used as an alternative  
 109 heat source for the building's hot water supply. Biogas production was estimated as a function of COD  
 110 removal, assuming that 90% of influent COD is removed [15,17,18]. Methane is produced at a rate of 0.25  
 111 and 0.26 m<sup>3</sup> CH<sub>4</sub> per kg of COD removed in the 23°C and 30°C reactors, respectively [19]. Five percent of  
 112 produced methane was assumed to be lost through gaps in the floating cover, contributing process GHG  
 113 emissions [20]. Neither nitrogen or phosphorus are removed from wastewater in anaerobic reactors [8]. All  
 114 influent TKN was assumed to be released in the form of ammonia. Membrane processes produce effluent  
 115 with less than 2 mg/L of total suspended solids [21].

116 Downflow-hanging sponge (DHS) and zeolite adsorption post-treatment processes are necessary to  
 117 ensure that treated effluent meets the criteria for unrestricted urban reuse. The DHS reactors recover or  
 118 destroy methane dissolved in AnMBR permeate and have the additional benefit of removing 55% and 73%  
 119 of COD and BOD remaining the wastewater. Performance of the two-stage DHS system was based on the  
 120 research of [22]. Methane removed from permeate in the stage-one reactor is recovered, contributing  
 121 additional avoided natural gas benefits. Overall, the DHS reactor recovers or destroys 99.3% of permeate  
 122 methane. Methane remaining in the treated wastewater following the DHS reactor was assumed to be off-  
 123 gassed contributing further process GHG emissions. Electricity consumption of the DHS reactors includes  
 124 wastewater pumping and blower operation. Steel, concrete, and piping material requirements were  
 125 estimated based on unit dimensions.

126 A zeolite adsorption system is used to remove ammonium from the wastewater to allow establishment  
 127 of a free chlorine residual without excessive sodium NaOCl demand. Ammonium adsorbs to zeolite in a  
 128 packed bed reactor, which is then flushed with sodium chloride (NaCl) facilitating reuse of zeolite media.  
 129 The resulting nitrogen rich brine solution is disposed of via deepwater injection, requiring 1.8 kWh of  
 130 electricity per cubic meter of injected brine. Deng et al. [23] indicates that such a system should be able to  
 131 remove greater than 95% of influent ammonium. The system was designed assuming an initial zeolite  
 132 adsorption capacity of 3.1 mg NH<sub>4</sub>-N per gram of zeolite media, which maintains sufficient adsorption  
 133 capacity throughout nine regeneration cycles. Average adsorption capacity across the nine regeneration  
 134 cycles is 2.4 mg NH<sub>4</sub>-N per gram zeolite. Sodium hydroxide (NaOH) is also included in the LCI to raise the  
 135 pH of the regeneration fluid, considerably reducing the NaCl requirement [23].

136 S1.5 *Recirculating vertical flow wetland*

137 The RVFW is a wetland based treatment process that uses active and continuous wastewater  
138 recirculation [24,25] to minimize land area requirements, making the process suitable for urban  
139 environments. Clarified wastewater is circulated over the surface of wetland planters. Wastewater filters  
140 downward through a 0.6 meter thick media bed consisting of crushed limestone and gravel. The media bed  
141 is suspended 0.5 meters above a concrete collection tank, into which wastewater falls, facilitating aeration.  
142 From the collection tank, water is recirculated to the surface.

143 Wastewater recirculation was determined based on results of a pilot-scale system (Gross et al. 2007),  
144 which reports that 8-12 hours of recirculation were sufficient to reach steady-state BOD and TSS removal  
145 when recirculating 300 liters of wastewater over one square meter of wetland area. This corresponds to  
146 treatment of 0.6 cubic meters of wastewater per square of wetland area per day. Sklarz et al. [25] identified  
147 an optimal recirculation rate of 1.5 meters (depth) per hour over the entire wetland surface. On average the  
148 system was assumed to remove 94% and 98% of influent TSS and BOD, respectively [24–27]

149 Process GHG emissions of nitrous oxide were estimated based on an emission factor of 0.006 kg  
150 N<sub>2</sub>O/m<sup>2</sup> wetland area per year [28]. Methane emissions were estimated using the IPCC method and the  
151 average methane correction factor specified for vertical subsurface flow constructed wetlands [7].

152 Pump electricity requirements were estimated using the identified recirculation rate and estimated  
153 headloss in the distribution piping. Steel grating is included in the wetland design to suspend the media  
154 bed above the concrete collection basin. High-density polyethylene piping is used for wastewater  
155 distribution.

## 156 *S1.6 Disinfection Processes*

157 All treatment systems use chlorination and UV disinfection processes while the RVFW treating mixed  
158 wastewater requires a third disinfection process. Ozone was selected for its effectiveness against both viral  
159 and protozoan pathogens and the desire for a second barrier of protection against protozoa.

160 Liquid sodium hypochlorite (NaOCl) is used as the chemical disinfectant. Development of the result  
161 LCI value considers instantaneous chlorine demand due to ammonia and total organic carbon (TOC)  
162 present in the treated wastewater as well as chlorine decay in the contact basin. Electricity consumption  
163 was estimated for operation of the peristaltic pump.

164 The UV disinfectant dose is based on delivered UV intensity considering nominal UV intensity,  
165 transmittance of the quartz sleeve, bulb age, and bulb output in the UV spectrum. Commercially available  
166 Sanitron® UV units were specified based on the required delivered dose necessary to meet LRTs.  
167 Manufacturer specifications provide estimates of electricity consumption [29].

168 Ozone is produced from liquid oxygen in a Primozone® GM series ozone generator. Manufacturer  
169 specifications were used to develop LCI quantities for liquid oxygen and electricity consumption [30].  
170 Ozone is injected into the effluent stream at the beginning of a three basin contact chamber. Instantaneous  
171 ozone demand is satisfied in the first chamber and is assessed on the basis of residual COD. Average ozone  
172 concentration in the second two chambers is used as the basis of effective ozone dose, considering ozone  
173 decay. Ozone decay was assessed assuming first-order decay and an average ozone half-life of 20 minutes  
174 [31].

## 175 *S1.7 Thermal recovery*

176 The analysis also looked at scenarios where the AeMBR treatment process was paired with a thermal  
177 recovery system. A heat pump is used to extract thermal energy from influent wastewater, transferring that  
178 thermal energy to the building's hot water system, and avoiding natural gas consumption. Wastewater and  
179 graywater enter a heat pump at 23°C and 30°C, respectively. A coefficient of performance (COP) is used to  
180 express the efficiency of the heat recovery process. Combined COPs, which consider both compressor and  
181 pump operation, of 2.5 and 2.6 were used for mixed wastewater and graywater treatment systems,

182 respectively [32]. Estimates of obtainable thermal power are based on the temperature difference between  
183 wastewater as it enters and exits the heat pump, which was estimated to be 4.2°C and 4.3°C for mixed  
184 wastewater and graywater treatment systems, respectively [32]. Total thermal recovery is the sum of  
185 obtainable thermal power plus the fraction of compressor power transferred to the working fluid less  
186 internal loss in the heat pump [33]. The thermal recovery LCI also includes electricity consumption of the  
187 pump and compressor, fugitive emissions of the R-134a refrigerant used in the heat pump [34], and avoided  
188 natural gas consumption.

#### 189 *S1.8 Collection and Distribution Systems*

190 Distribution of the recycled water for NPR requires its own piping system. Graywater recycling also  
191 requires a separate collection system. The collection and distribution systems were modelled as polyvinyl  
192 chloride (PVC) for the main vertical and zone risers, while crosslinked polyethylene (PEX) was modelled  
193 for in-unit main and distribution piping [35]. Recycled water was assumed to displace potable water  
194 treatment and distribution, with a 20% loss rate of water modelled during centralized treatment and  
195 distribution [36]. Displaced energy requirements from potable water distribution were based on the  
196 national median value from the review of literature sources in Xue et al. [37]. Although other background  
197 inventories were based on conditions reflective of the San Francisco region, the city's unique water supply  
198 system is gravity fed and distribution energy is anomalously low [38]. Net pumping energy for delivery of  
199 onsite recycled water was calculated as the difference between gross onsite pumping requirements and  
200 energy for potable water vertical pumping after taking into account the distribution pressure of the potable  
201 water supply [39].

#### 202 *S1.9 System Scaling*

203 To adapt LCIs to different treatment capacities in a way that maintained original design characteristics  
204 and isolated the effects of treatment capacity on system cost and environmental impact, LCI components  
205 of individual unit processes were scaled in ways that maintained original design specifications (e.g., HRT,  
206 oxygen transfer rates, chemical dosage rates, etc.) but updated applicable dimensional line items (e.g.,  
207 concrete, steel, energy, etc.). Tables S6 through S8 provide detail as to how individual LCI components of  
208 AeMBR, AnMBR and RVF systems were scaled. Impacts and cost of thermal recovery units were held  
209 constant per unit of flow. Final LCIs are provided in Tables S9 through S14.



Table S6. Scaling approach for AeMBR LCI components

| Unit Process | Parts Description   | Unit           | Constant/<br>Variable <sup>a</sup> | Scaling Approach                                                                  |
|--------------|---------------------|----------------|------------------------------------|-----------------------------------------------------------------------------------|
| Fine Screen  | Electricity         | kWh            | Variable                           | Energy use equation from [40]                                                     |
| Fine Screen  | Screening Disposal  | kg             | Constant                           | Constant fraction of flow                                                         |
| Fine Screen  | Steel               | kg             | Constant                           | Constant screen area per unit of flow                                             |
| Equalization | Concrete            | m <sup>3</sup> | Variable                           | Basin volume scaled to maintain HRT and depth to area ratio.                      |
| Equalization | Steel               | kg             | Variable                           | Basin volume scaled to maintain HRT and depth to area ratio.                      |
| Equalization | Electricity         | kWh            | Variable                           | Pumping energy varied as function of flow, adherence to original design equations |
| AeMBR        | Concrete            | m <sup>3</sup> | Variable                           | Basin volume scaled to maintain HRT and depth to area ratio.                      |
| AeMBR        | Steel               | kg             | Variable                           | Basin volume scaled to maintain HRT and depth to area ratio.                      |
| AeMBR        | Polyvinyl Fluoride  | kg             | Constant                           | Constant membrane area per unit of flow                                           |
| AeMBR        | Sodium Hypochlorite | kg             | Constant                           | Constant dose rate                                                                |
| AeMBR        | Electricity         | kwh            | Variable                           | Pumping energy varied as function of flow, adherence to original design equations |
| AeMBR        | Methane             | kg             | Constant                           | Constant fraction of flow                                                         |
| AeMBR        | N <sub>2</sub> O    | kg             | Constant                           | Constant fraction of flow                                                         |
| AeMBR        | Sludge              | m <sup>3</sup> | Constant                           | Constant fraction of flow                                                         |
| UV           | Electricity         | kWh            | Constant                           | Constant dose rate                                                                |
| UV           | Steel               | kg             | Constant                           | Number of units increased/decreased to maintain constant UV dose                  |
| Chlorination | Concrete            | m <sup>3</sup> | Variable                           | Basin volume scaled to maintain HRT and depth to area ratio.                      |
| Chlorination | Steel               | kg             | Variable                           | Basin volume scaled to maintain HRT and depth to area ratio.                      |
| Chlorination | Electricity         | kwh            | Constant                           | Constant electricity per unit of flow                                             |
| Chlorination | Sodium Hypochlorite | kg             | Constant                           | Constant dose rate                                                                |
| Storage      | HDPE                | kg             | Constant                           | Number of units increased/decreased to maintain constant storage capacity         |

<sup>a</sup> Constant refers to line items that are constant per unit of flow treated. Examples include chemical dose rates, such as 3 mg of NaOCl per liter of water treated.

Table S7. Scaling approach for AnMBR LCI components

| Unit Process | Parts Description   | Unit           | Constant/<br>Variable <sup>a</sup> | Scaling Approach                                                                  |
|--------------|---------------------|----------------|------------------------------------|-----------------------------------------------------------------------------------|
| Fine Screen  | Electricity         | kWh            | Variable                           | Energy use equation from [40]                                                     |
| Fine Screen  | Screening Disposal  | kg             | Constant                           | Constant fraction of flow                                                         |
| Fine Screen  | Steel               | kg             | Constant                           | Constant screen area per unit of flow                                             |
| Equalization | Concrete            | m <sup>3</sup> | Variable                           | Basin volume scaled to maintain HRT and depth to area ratio.                      |
| Equalization | Steel               | kg             | Variable                           | Basin volume scaled to maintain HRT and depth to area ratio.                      |
| Equalization | Electricity         | kWh            | Variable                           | Pumping energy varied as function of flow, adherence to original design equations |
| AnMBR        | Concrete            | m <sup>3</sup> | Variable                           | Basin volume scaled to maintain HRT and depth to area ratio.                      |
| AnMBR        | Steel               | kg             | Variable                           | Basin volume scaled to maintain HRT and depth to area ratio.                      |
| AnMBR        | HDPE                | kg             | Variable                           | Updated to account for new basin dimensions                                       |
| AnMBR        | Polyvinyl Fluoride  | kg             | Constant                           | Constant membrane area per unit of flow                                           |
| AnMBR        | Sodium Hypochlorite | kg             | Constant                           | Constant dose rate                                                                |
| AnMBR        | Electricity         | kwh            | Variable                           | Pumping energy varied as function of flow, adherence to original design equations |
| AnMBR        | Methane             | kg             | Constant                           | Constant fraction of flow                                                         |
| AnMBR        | Sludge              | m <sup>3</sup> | Constant                           | Constant fraction of flow                                                         |
| AnMBR        | Biogas Recovery     | m <sup>3</sup> | Constant                           | Constant fraction of flow                                                         |
| DHS          | Electricity         | kWh            | Constant                           | Constant per unit of flow                                                         |
| DHS          | Methane             | kg             | Constant                           | Constant per unit of flow                                                         |
| DHS          | Natural Gas         | m <sup>3</sup> | Constant                           | Constant per unit of flow                                                         |
| DHS          | Concrete            | m <sup>3</sup> | Variable                           | Basin volume scaled to maintain HRT and depth to area ratio.                      |
| DHS          | Steel               | kg             | Variable                           | Basin volume scaled to maintain HRT and depth to area ratio.                      |
| DHS          | HDPE                | kg             | Variable                           | Updated to account for new basin dimensions                                       |
| Zeolite      | Zeolite             | kg             | Constant                           | Constant per unit of flow                                                         |
| Zeolite      | NaCl (99+%)         | kg             | Constant                           | Constant per unit of flow                                                         |
| Zeolite      | NaOH                | kg             | Constant                           | Constant per unit of flow                                                         |

Table S7. Scaling approach for AnMBR LCI components

| Unit Process | Parts Description         | Unit           | Constant/<br>Variable <sup>a</sup> | Scaling Approach                                                          |
|--------------|---------------------------|----------------|------------------------------------|---------------------------------------------------------------------------|
| Zeolite      | Electricity               | kWh            | Variable                           | Scaled according to head associated with modified reaction chamber        |
| Zeolite      | Disposal, Brine Injection | m <sup>3</sup> | Constant                           | Constant fraction of flow                                                 |
| UV           | Electricity               | kWh            | Constant                           | Constant dose rate                                                        |
| UV           | Steel                     | kg             | Constant                           | Number of units increased/decreased to maintain constant UV dose          |
| Chlorination | Concrete                  | m <sup>3</sup> | Variable                           | Basin volume scaled to maintain HRT and depth to area ratio.              |
| Chlorination | Steel                     | kg             | Variable                           | Basin volume scaled to maintain HRT and depth to area ratio.              |
| Chlorination | Electricity               | kwh            | Constant                           | Constant electricity per unit of flow                                     |
| Chlorination | Sodium Hypochlorite       | kg             | Constant                           | Constant dose rate                                                        |
| Storage      | HDPE                      | kg             | Constant                           | Number of units increased/decreased to maintain constant storage capacity |

<sup>a</sup> Constant refers to line items that are constant per unit of flow treated. Examples include chemical dose rates, such as 3 mg of NaOCl per liter of water treated.

212

Table S8. Scaling approach for RVFW LCI components

| Unit Process | Parts Description  | Unit           | Constant/<br>Variable <sup>a</sup> | Scaling Approach                                                                  |
|--------------|--------------------|----------------|------------------------------------|-----------------------------------------------------------------------------------|
| Fine Screen  | Electricity        | kWh            | Variable                           | Energy use equation from [40]                                                     |
| Fine Screen  | Screening Disposal | kg             | Constant                           | Constant fraction of flow                                                         |
| Fine Screen  | Steel              | kg             | Constant                           | Constant screen area per unit of flow                                             |
| Clarifier    | Steel              | kg             | Variable                           | Basin volume scaled to maintain HRT and depth to area ratio.                      |
| Clarifier    | Sludge Disposal    | m <sup>3</sup> | Constant                           | Constant fraction of flow                                                         |
| Clarifier    | Electricity        | kWh            | Constant                           | Constant per unit of flow                                                         |
| Equalization | Concrete           | m <sup>3</sup> | Constant                           | Basin volume scaled to maintain HRT and depth to area ratio.                      |
| Equalization | Steel              | kg             | Variable                           | Basin volume scaled to maintain HRT and depth to area ratio.                      |
| Equalization | Electricity        | kWh            | Variable                           | Pumping energy varied as function of flow, adherence to original design equations |

Table S8. Scaling approach for RVFW LCI components

| Unit Process | Parts Description              | Unit           | Constant/<br>Variable <sup>a</sup> | Scaling Approach                                                          |
|--------------|--------------------------------|----------------|------------------------------------|---------------------------------------------------------------------------|
| RVFW         | Concrete                       | m <sup>3</sup> | Variable                           | Number of basins varied to maintain constant loading rate                 |
| RVFW         | Steel - Pumps                  | kg             | Constant                           | Pump size held constant, number of pumps changed based on flow            |
| RVFW         | Steel - Grating                | kg             | Constant                           | Number of basins varied to maintain constant loading rate                 |
| RVFW         | Steel - Rebar                  | kg             | Variable                           | Number of basins varied to maintain constant loading rate                 |
| RVFW         | HDPE                           | kg             | Variable                           | Number of basins varied to maintain constant loading rate                 |
| RVFW         | Electricity                    | kwh            | Variable                           | Varied to account for new basin dimensions                                |
| RVFW         | Lower Media, Crushed Limestone | kg             | Variable                           | Number of basins varied to maintain constant loading rate                 |
| RVFW         | Middle Media, Gravel           | kg             | Variable                           | Number of basins varied to maintain constant loading rate                 |
| RVFW         | Organic Cover, Wood Chips      | kg             | Variable                           | Number of basins varied to maintain constant loading rate                 |
| RVFW         | Methane                        | kg             | Constant                           | Constant fraction of flow                                                 |
| RVFW         | CO <sub>2</sub> , biogenic     | kg             | Constant                           | Constant fraction of flow                                                 |
| RVFW         | N <sub>2</sub> O               | kg             | Constant                           | Constant fraction of flow                                                 |
| UV           | Electricity                    | kWh            | Constant                           | Constant dose rate                                                        |
| UV           | Steel                          | kg             | Constant                           | Number of units increased/decreased to maintain constant UV dose          |
| Chlorination | Concrete                       | m <sup>3</sup> | Variable                           | Basin volume scaled to maintain HRT and depth to area ratio.              |
| Chlorination | Steel                          | kg             | Variable                           | Basin volume scaled to maintain HRT and depth to area ratio.              |
| Chlorination | Electricity                    | kwh            | Constant                           | Constant electricity per unit of flow                                     |
| Chlorination | Sodium Hypochlorite            | kg             | Constant                           | Constant dose rate                                                        |
| Storage      | Electricity                    | kWh            | Constant                           | Constant electricity per unit of flow                                     |
| Storage      | HDPE                           | kg             | Constant                           | Number of units increased/decreased to maintain constant storage capacity |

<sup>a</sup> Constant refers to line items that are constant per unit of flow treated. Examples include chemical dose rates, such as 3 mg of NaOCl per liter of water treated.

214 S1.10 Life cycle inventories

215 Resulting LCIs for each treatment system are provided in Table S9-S11.

216 Table S9. Graywater AeMBR LCI.

| Unit Process                  | Inventory Item                 | Scenario 1        | Scenario 2     | Scenario 3       | Units (per m <sup>3</sup> treated graywater) |
|-------------------------------|--------------------------------|-------------------|----------------|------------------|----------------------------------------------|
|                               |                                | Partial Treatment | Full Treatment | Excess Treatment |                                              |
| Centralized Wastewater        | Solids and Residual Blackwater | 1.40              | 0.919          | 0.593            | m <sup>3</sup>                               |
| Potable Water                 | Avoided                        | 1.00              | 1.00           | 0.830            | m <sup>3</sup>                               |
| Fine Screen                   | Electricity                    | 0.137             | 0.119          | 0.107            | kWh                                          |
|                               | Screening Disposal             | 4.07E-3           | 4.07E-3        | 4.07E-3          | kg                                           |
|                               | Steel                          | 2.14E-3           | 1.65E-3        | 1.34E-3          | kg                                           |
| Equalization                  | Concrete                       | 1.82E-5           | 1.62E-5        | 1.48E-5          | m <sup>3</sup>                               |
|                               | Steel                          | 1.08E-3           | 9.64E-4        | 8.81E-4          | kg                                           |
|                               | Electricity                    | 0.095             | 0.095          | 0.095            | kWh                                          |
| AeMBR                         | Concrete                       | 2.94E-5           | 2.59E-5        | 2.36E-5          | m <sup>3</sup>                               |
|                               | Steel                          | 1.87E-3           | 1.63E-3        | 1.47E-3          | kg                                           |
|                               | Polyvinyl Fluoride             | 5.92E-4           | 5.92E-4        | 5.92E-4          | kg                                           |
|                               | Sodium Hypochlorite            | 7.19E-4           | 7.19E-4        | 7.19E-4          | kg                                           |
|                               | Electricity                    | 0.428             | 0.428          | 0.428            | kwh                                          |
|                               | Methane                        | 4.86E-3           | 4.86E-3        | 4.86E-3          | kg                                           |
|                               | N <sub>2</sub> O               | 5.01E-5           | 5.01E-5        | 5.01E-5          | kg                                           |
|                               | Sludge                         | 8.32E-3           | 8.32E-3        | 8.32E-3          | m <sup>3</sup>                               |
| UV                            | Electricity                    | 0.017             | 0.017          | 0.017            | kWh                                          |
|                               | Steel                          | 3.42E-5           | 3.42E-5        | 3.42E-5          | kg                                           |
| Chlorination                  | Concrete                       | 1.92E-6           | 1.73E-6        | 1.59E-6          | m <sup>3</sup>                               |
|                               | Steel                          | 5.18E-5           | 4.64E-5        | 4.26E-5          | kg                                           |
|                               | Electricity                    | 0.081             | 0.081          | 0.081            | kwh                                          |
|                               | Sodium Hypochlorite            | 3.20E-3           | 3.20E-3        | 3.20E-3          | kg NaOCl                                     |
| Storage                       | HDPE                           | 7.21E-4           | 1.11E-3        | 9.01E-4          | kg                                           |
| Recycled Water Delivery       | Electricity                    | 0.100             | 0.100          | 0.100            | kWh                                          |
|                               | PEX pipe, 1/2"                 | 3.66E-4           | 3.66E-4        | 3.66E-4          | m                                            |
|                               | PEX pipe, 1"                   | 2.40E-3           | 2.40E-3        | 2.40E-3          | m                                            |
|                               | PVC pipe, 1"                   | 8.53E-4           | 8.53E-4        | 8.53E-4          | m                                            |
|                               | PVC pipe, 2"                   | 2.79E-4           | 2.79E-4        | 2.79E-4          | m                                            |
| Thermal Recovery <sup>a</sup> | Electricity                    | 4.10              | 4.10           | 4.10             | kWh                                          |
|                               | Electricity, Avoided           | 7.52              | 7.52           | 7.52             | kWh                                          |
|                               | Natural Gas, Avoided           | 0.901             | 0.901          | 0.901            | m <sup>3</sup>                               |

| Unit Process | Inventory Item          | Scenario 1        | Scenario 2     | Scenario 3       | Units (per m <sup>3</sup> treated graywater) |
|--------------|-------------------------|-------------------|----------------|------------------|----------------------------------------------|
|              |                         | Partial Treatment | Full Treatment | Excess Treatment |                                              |
|              | R-134a, emission to air | 1.56E-5           | 1.56E-5        | 1.56E-5          | kg                                           |

217 <sup>a</sup>Optional unit process.

218 Table S10. Mixed Wastewater AeMBR

| Unit Process                  | Inventory Item             | Scenario 1        | Scenario 2     | Scenario 3       | Units (per m <sup>3</sup> treated wastewater) |
|-------------------------------|----------------------------|-------------------|----------------|------------------|-----------------------------------------------|
|                               |                            | Partial Treatment | Full Treatment | Excess Treatment |                                               |
| Centralized Wastewater        | Treatment of Offsite Water | 1.40              | 0.919          | 0.593            | m <sup>3</sup>                                |
| Potable Water                 | Avoided                    | 1.00              | 1.00           | 0.830            | m <sup>3</sup>                                |
| Fine Screen                   | Electricity                | 0.137             | 0.119          | 0.107            | kWh                                           |
|                               | Screening Disposal         | 9.54E-3           | 9.54E-3        | 9.54E-3          | kg                                            |
|                               | Steel                      | 2.14E-3           | 1.65E-3        | 1.34E-3          | kg                                            |
| Equalization                  | Concrete                   | 1.82E-5           | 1.62E-5        | 1.48E-5          | m <sup>3</sup>                                |
|                               | Steel                      | 1.08E-3           | 9.64E-4        | 8.81E-4          | kg                                            |
|                               | Electricity                | 0.095             | 0.095          | 0.095            | kWh                                           |
| AeMBR                         | Concrete                   | 2.94E-5           | 2.59E-5        | 2.36E-5          | m <sup>3</sup>                                |
|                               | Steel                      | 1.87E-3           | 1.63E-3        | 1.47E-3          | kg                                            |
|                               | Polyvinyl Fluoride         | 5.92E-4           | 5.92E-4        | 5.92E-4          | kg                                            |
|                               | Sodium Hypochlorite        | 7.19E-4           | 7.19E-4        | 7.19E-4          | kg                                            |
|                               | Electricity                | 0.622             | 0.622          | 0.622            | kwh                                           |
|                               | Methane                    | 5.94E-3           | 5.94E-3        | 5.94E-3          | kg                                            |
|                               | N <sub>2</sub> O           | 2.03E-4           | 2.03E-4        | 2.03E-4          | kg                                            |
| UV                            | Sludge                     | 0.014             | 0.014          | 0.014            | m <sup>3</sup>                                |
|                               | Electricity                | 0.014             | 0.014          | 0.014            | kWh                                           |
| Chlorination                  | Steel                      | 3.15E-5           | 3.15E-5        | 3.15E-5          | kg                                            |
|                               | Concrete                   | 1.86E-6           | 1.68E-6        | 1.55E-6          | m <sup>3</sup>                                |
|                               | Steel                      | 5.08E-5           | 4.56E-5        | 4.19E-5          | kg                                            |
|                               | Electricity                | 0.081             | 0.081          | 0.081            | kwh                                           |
| Storage                       | Sodium Hypochlorite        | 3.60E-3           | 3.60E-3        | 3.60E-3          | kg NaOCl                                      |
|                               | HDPE                       | 7.21E-4           | 1.11E-3        | 9.01E-4          | kg                                            |
| Recycled Water Delivery       | Electricity                | 0.100             | 0.100          | 0.100            | kWh                                           |
|                               | PEX pipe, 1/2"             | 3.66E-4           | 3.66E-4        | 3.66E-4          | m                                             |
|                               | PEX pipe, 1"               | 2.40E-3           | 2.40E-3        | 2.40E-3          | m                                             |
|                               | PVC pipe, 1"               | 8.53E-4           | 8.53E-4        | 8.53E-4          | m                                             |
|                               | PVC pipe, 2"               | 2.79E-4           | 2.79E-4        | 2.79E-4          | m                                             |
| Thermal Recovery <sup>a</sup> | Electricity                | 4.21              | 4.21           | 4.21             | kWh                                           |
|                               | Electricity, Avoided       | 7.40              | 7.40           | 7.40             | kWh                                           |

| Unit Process | Inventory Item          | Scenario 1        | Scenario 2     | Scenario 3       | Units (per m <sup>3</sup> treated wastewater) |
|--------------|-------------------------|-------------------|----------------|------------------|-----------------------------------------------|
|              |                         | Partial Treatment | Full Treatment | Excess Treatment |                                               |
|              | Natural Gas, Avoided    | 0.887             | 0.887          | 0.887            | m <sup>3</sup>                                |
|              | R-134a, emission to air | 9.98E-6           | 1.00           | 2.00             | kg                                            |

Table S11. Graywater AnMBR LCI.

| Unit Process           | Inventory Item             | Scenario 1        | Scenario 2     | Scenario 3       | Units (per m <sup>3</sup> treated graywater) |
|------------------------|----------------------------|-------------------|----------------|------------------|----------------------------------------------|
|                        |                            | Partial Treatment | Full Treatment | Excess Treatment |                                              |
| Centralized Wastewater | Treatment of Offsite Water | 1.40              | 0.919          | 0.593            | m <sup>3</sup>                               |
| Potable Water          | Avoided                    | 1.00              | 1.00           | 0.830            | m <sup>3</sup>                               |
| Fine Screen            | Electricity                | 0.137             | 0.119          | 0.107            | kWh                                          |
|                        | Screening Disposal         | 4.07E-3           | 4.07E-3        | 4.07E-3          | kg                                           |
|                        | Steel                      | 2.14E-3           | 1.65E-3        | 1.34E-3          | kg                                           |
| Equalization           | Concrete                   | 1.82E-5           | 1.62E-5        | 1.48E-5          | m <sup>3</sup>                               |
|                        | Steel                      | 1.08E-3           | 9.64E-4        | 8.81E-4          | kg                                           |
|                        | Electricity                | 0.095             | 0.095          | 0.095            | kWh                                          |
| Chlorination           | Concrete                   | 1.92E-6           | 1.73E-6        | 1.59E-6          | m <sup>3</sup>                               |
|                        | Steel                      | 5.18E-5           | 4.64E-5        | 4.26E-5          | kg                                           |
|                        | Electricity                | 0.081             | 0.081          | 0.081            | kwh                                          |
|                        | Sodium Hypochlorite        | 5.79E-3           | 5.79E-3        | 5.79E-3          | kg NaOCl                                     |
| AnMBR                  | Concrete                   | 6.53E-5           | 5.58E-5        | 4.97E-5          | m <sup>3</sup>                               |
|                        | Steel                      | 3.56E-3           | 3.01E-3        | 2.66E-3          | kg                                           |
|                        | HDPE                       | 1.56E-4           | 1.24E-4        | 1.04E-4          | kg                                           |
|                        | Polyvinyl Fluoride         | 1.58E-3           | 1.58E-3        | 1.58E-3          | kg                                           |
|                        | Sodium Hypochlorite        | 1.92E-3           | 1.92E-3        | 1.92E-3          | kg                                           |
|                        | Electricity                | 0.726             | 0.749          | 0.768            | kwh                                          |
|                        | Electricity Sensitivity    | 0.149             | 0.150          | 0.152            | kwh                                          |
|                        | Methane                    | 2.42E-3           | 2.42E-3        | 2.42E-3          | kg                                           |
|                        | Sludge Disposal            | 7.25E-3           | 7.25E-3        | 7.25E-3          | m <sup>3</sup>                               |
| Biogas Recovery        | Natural Gas                | 0.045             | 0.045          | 0.045            | m <sup>3</sup>                               |
| DHS                    | Electricity                | 0.035             | 0.035          | 0.035            | kWh                                          |
|                        | Methane                    | 1.29E-4           | 1.29E-4        | 1.29E-4          | kg                                           |
|                        | Natural Gas                | 0.013             | 0.013          | 0.013            | m <sup>3</sup>                               |
|                        | Concrete                   | 3.07E-5           | 2.75E-5        | 2.53E-5          | m <sup>3</sup>                               |
|                        | Steel                      | 1.40E-3           | 1.28E-3        | 1.19E-3          | kg                                           |
|                        | HDPE                       | 3.43E-5           | 2.76E-5        | 2.33E-5          | kg                                           |
| Zeolite                | Zeolite                    | 0.112             | 0.112          | 0.112            | kg                                           |
|                        | NaCl (99+%)                | 0.055             | 0.055          | 0.055            | kg                                           |

Table S11. Graywater AnMBR LCI.

| Unit Process            | Inventory Item            | Scenario 1        | Scenario 2     | Scenario 3       | Units (per m <sup>3</sup> treated graywater) |
|-------------------------|---------------------------|-------------------|----------------|------------------|----------------------------------------------|
|                         |                           | Partial Treatment | Full Treatment | Excess Treatment |                                              |
|                         | NaOH                      | 0.200             | 0.200          | 0.200            | kg                                           |
|                         | Electricity               | 0.025             | 0.029          | 0.034            | kWh                                          |
|                         | Disposal, Brine Injection | 5.51E-3           | 5.51E-3        | 5.51E-3          | m <sup>3</sup>                               |
| UV                      | Electricity               | 0.017             | 0.017          | 0.017            | kWh                                          |
|                         | Steel                     | 3.42E-5           | 3.42E-5        | 3.42E-5          | kg                                           |
| Storage                 | HDPE                      | 7.21E-4           | 1.11E-3        | 9.01E-4          | kg                                           |
| Recycled Water Delivery | Electricity               | 0.100             | 0.100          | 0.083            | kWh                                          |
|                         | PEX pipe, 1/2"            | 3.66E-4           | 3.66E-4        | 3.66E-4          | m                                            |
|                         | PEX pipe, 1"              | 2.40E-3           | 2.40E-3        | 2.40E-3          | m                                            |
|                         | PVC pipe, 1"              | 8.53E-4           | 8.53E-4        | 8.53E-4          | m                                            |
|                         | PVC pipe, 2"              | 2.79E-4           | 2.79E-4        | 2.79E-4          | m                                            |

220

Table S12. Mixed Wastewater AnMBR LCI

| Unit Process           | Inventory Item             | Scenario 1        | Scenario 2     | Scenario 3       | Units (per m <sup>3</sup> treated wastewater) |
|------------------------|----------------------------|-------------------|----------------|------------------|-----------------------------------------------|
|                        |                            | Partial Treatment | Full Treatment | Excess Treatment |                                               |
| Centralized Wastewater | Treatment of Offsite Water | 1.40              | 0.919          | 0.593            | m <sup>3</sup>                                |
| Potable Water          | Avoided                    | 1.00              | 1.00           | 0.830            | m <sup>3</sup>                                |
| Fine Screen            | Electricity                | 0.137             | 0.119          | 0.107            | kWh                                           |
|                        | Screening Disposal         | 9.54E-3           | 9.54E-3        | 9.54E-3          | kg                                            |
|                        | Steel                      | 2.14E-3           | 1.65E-3        | 1.34E-3          | kg                                            |
| Equalization           | Concrete                   | 1.82E-5           | 1.62E-5        | 1.48E-5          | m <sup>3</sup>                                |
|                        | Steel                      | 1.08E-3           | 9.64E-4        | 8.81E-4          | kg                                            |
|                        | Electricity                | 0.095             | 0.095          | 0.095            | kWh                                           |
| Chlorination           | Concrete                   | 1.95E-6           | 1.75E-6        | 1.62E-6          | m <sup>3</sup>                                |
|                        | Steel                      | 5.25E-5           | 4.71E-5        | 4.32E-5          | kg                                            |
|                        | Electricity                | 0.081             | 0.081          | 0.081            | kwh                                           |
|                        | Sodium Hypochlorite        | 0.012             | 0.012          | 0.012            | kg NaOCl                                      |
| AnMBR                  | Concrete                   | 6.53E-5           | 5.58E-5        | 4.97E-5          | m <sup>3</sup>                                |
|                        | Steel                      | 3.56E-3           | 3.01E-3        | 2.66E-3          | kg                                            |
|                        | HDPE                       | 2.69E-4           | 2.12E-4        | 1.77E-4          | kg                                            |
|                        | Polyvinyl Fluoride         | 1.58E-3           | 1.58E-3        | 1.58E-3          | kg                                            |
|                        | Sodium Hypochlorite        | 1.92E-3           | 1.92E-3        | 1.92E-3          | kg                                            |
|                        | Electricity                | 0.715             | 0.737          | 0.755            | kwh                                           |
|                        | Electricity Sensitivity    | 0.148             | 0.150          | 0.151            | kwh                                           |



Table S12. Mixed Wastewater AnMBR LCI

| Unit Process            | Inventory Item            | Scenario 1        | Scenario 2     | Scenario 3       | Units (per m <sup>3</sup> treated wastewater) |
|-------------------------|---------------------------|-------------------|----------------|------------------|-----------------------------------------------|
|                         |                           | Partial Treatment | Full Treatment | Excess Treatment |                                               |
|                         | Methane                   | 3.49E-3           | 3.49E-3        | 3.49E-3          | kg                                            |
|                         | Sludge Disposal           | 7.25E-3           | 7.25E-3        | 7.25E-3          | m <sup>3</sup>                                |
|                         | Natural Gas               | 0.070             | 0.070          | 0.070            | m <sup>3</sup>                                |
| DHS                     | Electricity               | 0.035             | 0.035          | 0.035            | kWh                                           |
|                         | Methane                   | 1.46E-4           | 1.46E-4        | 1.46E-4          | kg                                            |
|                         | Natural Gas               | 0.014             | 0.014          | 0.014            | m <sup>3</sup>                                |
|                         | Concrete                  | 3.07E-5           | 2.75E-5        | 2.53E-5          | m <sup>3</sup>                                |
|                         | Steel                     | 1.40E-3           | 1.28E-3        | 1.19E-3          | kg                                            |
|                         | HDPE                      | 6.35E-5           | 5.16E-5        | 4.40E-5          | kg                                            |
| Zeolite                 | Zeolite                   | 0.360             | 0.360          | 0.360            | kg                                            |
|                         | NaCl (99+%)               | 0.227             | 0.227          | 0.227            | kg                                            |
|                         | NaOH                      | 0.200             | 0.200          | 0.200            | kg                                            |
|                         | Electricity               | 0.024             | 0.029          | 0.034            | kWh                                           |
|                         | Disposal, Brine Injection | 0.023             | 0.023          | 0.023            | m <sup>3</sup>                                |
| UV                      | Electricity               | 0.034             | 0.026          | 0.021            | kWh                                           |
|                         | Steel                     | 3.15E-5           | 3.15E-5        | 3.15E-5          | kg                                            |
| Storage                 | HDPE                      | 7.21E-4           | 1.11E-3        | 9.01E-4          | kg                                            |
| Recycled Water Delivery | Electricity               | 0.100             | 0.100          | 0.083            | kWh                                           |
|                         | PEX pipe, 1/2"            | 1.15E-3           | 1.15E-3        | 1.15E-3          | m                                             |
|                         | PEX pipe, 1"              | 7.56E-4           | 7.56E-4        | 7.56E-4          | m                                             |
|                         | PVC pipe, 1"              | 2.68E-4           | 2.68E-4        | 2.68E-4          | m                                             |
|                         | PVC pipe, 2"              | 8.78E-5           | 8.78E-5        | 8.78E-5          | m                                             |

221

222

Table S13. Graywater RVFW LCI.

| Unit Process           | Inventory Item             | Scenario 1        | Scenario 2     | Scenario 3       | Units (per m <sup>3</sup> treated graywater) |
|------------------------|----------------------------|-------------------|----------------|------------------|----------------------------------------------|
|                        |                            | Partial Treatment | Full Treatment | Excess Treatment |                                              |
| Centralized Wastewater | Treatment of Offsite Water | 1.40              | 0.919          | 0.593            | m <sup>3</sup>                               |
| Potable Water          | Avoided                    | 1.00              | 1.00           | 0.830            | m <sup>3</sup>                               |
| Fine Screen            | Electricity                | 0.137             | 0.119          | 0.107            | kWh                                          |
|                        | Screening Disposal         | 4.08E-3           | 4.08E-3        | 4.08E-3          | kg                                           |
|                        | Steel                      | 2.14E-3           | 1.65E-3        | 1.34E-3          | kg                                           |
| Chlorination           | Concrete                   | 1.93E-6           | 1.74E-6        | 1.60E-6          | m <sup>3</sup>                               |
|                        | Steel                      | 6.85E-5           | 5.27E-5        | 4.28E-5          | kg                                           |

| Unit Process            | Inventory Item                 | Scenario 1        | Scenario 2     | Scenario 3       | Units (per m <sup>3</sup> treated graywater) |
|-------------------------|--------------------------------|-------------------|----------------|------------------|----------------------------------------------|
|                         |                                | Partial Treatment | Full Treatment | Excess Treatment |                                              |
|                         | Electricity                    | 0.081             | 0.081          | 0.081            | kwh                                          |
|                         | Sodium Hypochlorite            | 1.50E-3           | 1.50E-3        | 1.50E-3          | kg NaOCl                                     |
| RVFW                    | Concrete                       | 7.45E-5           | 5.73E-5        | 9.32E-5          | m <sup>3</sup>                               |
|                         | Steel                          | 4.99E-5           | 3.84E-5        | 6.24E-5          | kg                                           |
|                         | Steel                          | 7.86E-3           | 7.86E-3        | 7.86E-3          | kg                                           |
|                         | Steel                          | 2.13E-3           | 1.64E-3        | 2.67E-3          | kg                                           |
|                         | HDPE                           | 6.66E-4           | 5.12E-4        | 8.32E-4          | kg                                           |
|                         | Electricity                    | 0.338             | 0.260          | 0.423            | kwh                                          |
|                         | Lower Media, Crushed Limestone | 0.017             | 0.013          | 0.022            | kg                                           |
|                         | Middle Media, Gravel           | 0.061             | 0.047          | 0.076            | kg                                           |
|                         | Organic Cover, Wood Chips      | 0.065             | 0.050          | 0.081            | kg                                           |
|                         | Methane                        | 7.45E-4           | 7.45E-4        | 7.45E-4          | kg                                           |
|                         | CO <sub>2</sub> , biogenic     | 0.015             | 0.012          | 0.019            | kg                                           |
|                         | N <sub>2</sub> O               | 2.61E-5           | 2.00E-5        | 3.26E-5          | kg                                           |
|                         | Clarifier                      | Steel             | 6.07E-3        | 4.67E-3          | 3.80E-3                                      |
| Sludge Disposal         |                                | 7.32E-3           | 7.32E-3        | 7.32E-3          | m <sup>3</sup>                               |
| Electricity             |                                | 6.41E-4           | 6.41E-4        | 6.41E-4          | kWh                                          |
| Equalization            | Concrete                       | 1.74E-5           | 1.80E-5        | 1.86E-5          | m <sup>3</sup>                               |
|                         | Steel                          | 4.98E-4           | 5.16E-4        | 5.34E-4          | kg                                           |
|                         | HPDE                           | 7.23E-5           | 5.56E-5        | 7.92E-5          | kg                                           |
|                         | Electricity                    | 0.197             | 0.197          | 0.197            | kWh                                          |
| UV                      | Electricity                    | 0.056             | 0.056          | 0.056            | kWh                                          |
|                         | Steel                          | 7.88E-5           | 6.06E-5        | 4.92E-5          | kg                                           |
| Storage                 | HDPE                           | 2.16E-3           | 1.66E-3        | 1.80E-3          | kg                                           |
|                         | Electricity                    | 0.045             | 0.045          | 0.045            | kWh                                          |
| Recycled Water Delivery | Electricity                    | 0.100             | 0.100          | 0.083            | kWh                                          |
|                         | PEX pipe, 1/2"                 | 3.66E-4           | 3.66E-4        | 3.66E-4          | m                                            |
|                         | PEX pipe, 1"                   | 2.40E-3           | 2.40E-3        | 2.40E-3          | m                                            |
|                         | PVC pipe, 1"                   | 8.53E-4           | 8.53E-4        | 8.53E-4          | m                                            |
|                         | PVC pipe, 2"                   | 2.79E-4           | 2.79E-4        | 2.79E-4          | m                                            |

Table S14. Mixed Wastewater RVFW LCI

| Unit Process           | Inventory Item             | Scenario 1        | Scenario 2     | Scenario 3       | Units (per m <sup>3</sup> treated wastewater) |
|------------------------|----------------------------|-------------------|----------------|------------------|-----------------------------------------------|
|                        |                            | Partial Treatment | Full Treatment | Excess Treatment |                                               |
| Centralized Wastewater | Treatment of Offsite Water | 1.4               | 0.919          | 0.593            | m <sup>3</sup>                                |
| Potable Water          | Avoided                    | 1                 | 1              | 0.83             | m <sup>3</sup>                                |

| Unit Process            | Inventory Item                 | Scenario 1        | Scenario 2     | Scenario 3       | Units (per m <sup>3</sup> treated wastewater) |
|-------------------------|--------------------------------|-------------------|----------------|------------------|-----------------------------------------------|
|                         |                                | Partial Treatment | Full Treatment | Excess Treatment |                                               |
| Fine Screen             | Electricity                    | 0.137             | 0.119          | 0.107            | kWh                                           |
|                         | Screening Disposal             | 9.54E-03          | 9.54E-03       | 9.54E-03         | kg                                            |
|                         | Steel                          | 2.14E-03          | 1.65E-03       | 1.34E-03         | kg                                            |
| Chlorination            | Concrete                       | 1.92E-06          | 1.73E-06       | 1.60E-06         | m <sup>3</sup>                                |
|                         | Steel                          | 5.15E-05          | 4.63E-05       | 4.25E-05         | kg                                            |
|                         | Electricity                    | 0.081             | 0.081          | 0.081            | kwh                                           |
|                         | Sodium Hypochlorite            | 1.57E-03          | 1.57E-03       | 1.57E-03         | kg NaOCl                                      |
| RVFW                    | Concrete                       | 7.35E-05          | 5.65E-05       | 9.18E-05         | m <sup>3</sup>                                |
|                         | Steel                          | 1.50E-04          | 1.15E-04       | 9.36E-05         | kg                                            |
|                         | Steel                          | 7.86E-03          | 7.86E-03       | 7.86E-03         | kg                                            |
|                         | Steel                          | 2.10E-03          | 1.62E-03       | 2.63E-03         | kg                                            |
|                         | HDPE                           | 6.66E-04          | 5.12E-04       | 8.32E-04         | kg                                            |
|                         | Electricity                    | 0.338             | 0.26           | 0.423            | kwh                                           |
|                         | Lower Media, Crushed Limestone | 0.017             | 0.013          | 0.022            | kg                                            |
|                         | Middle Media, Gravel           | 0.061             | 0.047          | 0.076            | kg                                            |
|                         | Organic Cover, Wood Chips      | 0.065             | 0.05           | 0.081            | kg                                            |
|                         | Methane                        | 9.05E-04          | 9.05E-04       | 9.05E-04         | kg                                            |
|                         | CO <sub>2</sub> , biogenic     | 0.015             | 0.012          | 0.019            | kg                                            |
|                         | N <sub>2</sub> O               | 2.61E-05          | 2.00E-05       | 3.26E-05         | kg                                            |
| Clarifier               | Steel                          | 9.11E-03          | 7.01E-03       | 5.69E-03         | kg                                            |
|                         | Sludge Disposal                | 0.017             | 0.017          | 0.017            | m <sup>3</sup>                                |
|                         | Electricity                    | 1.50E-03          | 1.50E-03       | 1.50E-03         | kWh                                           |
| Equalization            | Concrete                       | 1.36E-05          | 1.40E-05       | 1.44E-05         | m <sup>3</sup>                                |
|                         | Steel                          | 3.89E-04          | 4.00E-04       | 4.12E-04         | kg                                            |
|                         | HPDE                           | 7.15E-05          | 5.50E-05       | 7.82E-05         | kg                                            |
|                         | Electricity                    | 0.197             | 0.197          | 0.197            | kWh                                           |
| UV                      | Electricity                    | 0.089             | 0.068          | 0.056            | kWh                                           |
|                         | Steel                          | 7.88E-05          | 6.06E-05       | 4.92E-05         | kg                                            |
| Storage                 | HDPE                           | 2.89E-03          | 2.77E-03       | 2.71E-03         | kg                                            |
|                         | Electricity                    | 0.045             | 0.045          | 0.045            | kWh                                           |
| Ozone                   | Electricity                    | 0.21              | 0.21           | 0.21             | kWh                                           |
|                         | Oxygen                         | 0.131             | 0.131          | 0.131            | kg                                            |
| Recycled Water Delivery | Electricity                    | 0.1               | 0.1            | 0.083            | kWh                                           |
|                         | PEX pipe, 1/2"                 | 1.15E-03          | 1.15E-03       | 1.15E-03         | m                                             |
|                         | PEX pipe, 1"                   | 7.56E-04          | 7.56E-04       | 7.56E-04         | m                                             |
|                         | PVC pipe, 1"                   | 2.68E-04          | 2.68E-04       | 2.68E-04         | m                                             |
|                         | PVC pipe, 2"                   | 8.78E-05          | 8.78E-05       | 8.78E-05         | m                                             |

225 **S2. Water Use Scenarios**

226 Indoor flows were defined following [35] using data that reflect the implementation of water  
 227 conservation efforts typical of new building construction. Residential demand is defined as 35.8 gallons per  
 228 capita per day (gpcd), less than the national average of 52 gpcd [41]. Commercial demand is defined as 11.3  
 229 gpcd following [42]. Graywater generation is assumed to be 72% of residential indoor demand [41] and  
 230 37% of commercial indoor demand [43], with the remainder of each flow allocated to blackwater. These  
 231 assumptions result in the onsite generation of 0.016 million gallons per day (MGD) of graywater or 0.025  
 232 MGD of mixed wastewater.

233 Even with water conservation efforts, non-potable demand, which is defined here as the water  
 234 required for toilet flushing, laundry and outdoor irrigation, has the potential to vary depending on actual  
 235 indoor water use efficiency and outdoor irrigation demand. For example, Morelli et al. [35] developed two  
 236 scenarios to contrast the implementation of high efficiency fixtures and low irrigation demand with average  
 237 efficiency fixtures and high irrigation demand, with resulting building-wide non-potable demands of  
 238 0.0082 MGD and 0.018 MGD, respectively. For this study, an average of the two, or 0.013 MGD, is assumed.

Table S15. Water Use Scenarios (Million Gallons per Day)

| Flows within Large Building<br>(1110 Occupants) | Partial Treatment                                | Full Treatment                                   | Excess Treatment                                 |
|-------------------------------------------------|--------------------------------------------------|--------------------------------------------------|--------------------------------------------------|
|                                                 | Treatment System<br>Size < Non-potable<br>Demand | Treatment System<br>Size = Non-potable<br>Demand | Treatment System<br>Size > Non-potable<br>Demand |
| Non-potable Demand <sup>a</sup>                 | 0.013                                            | 0.013                                            | 0.013                                            |
| Graywater Generation <sup>b</sup>               | 0.016                                            | 0.016                                            | 0.016                                            |
| Mixed Wastewater Generation <sup>b</sup>        | 0.025                                            | 0.025                                            | 0.025                                            |
| Treatment System Size <sup>c</sup>              | 0.010                                            | 0.013                                            | 0.016                                            |
| Potable Offset <sup>d</sup>                     | 0.010                                            | 0.013                                            | 0.013                                            |

239 <sup>a</sup> Average of high reuse and low reuse scenarios described in [35]

240 <sup>b</sup> [35]

241 <sup>c</sup> Treatment system size equal to 80%, 100% and 120% of non-potable demand for Scenarios 1, 2 and 3, respectively

242 <sup>d</sup> Equivalent to non-potable demand satisfied

243 **S3. QMRA Methods**

244 Details of QMRA methodology including exposure routes, use of reference pathogens and dose-  
 245 response functions, characterization of pathogen concentrations and pathogen treatment are listed in  
 246 Sections S3.1-S3.4. Section S3.5 lists treatment performance (TP) of specific unit processes for the associated  
 247 dose.

248 *S3.1 Exposure routes*

249 For toilet flush water and clothes washing, we assumed that  $4 \times 10^{-5}$  L of water was consumed per day  
 250 for 365 days a year and  $10^{-3}$  L per day for irrigation for 50 days a year, adopted from [44]. We also included  
 251 accidental ingestion of the treated water for one day of the year for 10% of the population at a volume of 2  
 252 L, to be consistent with the exposure assumptions included in the LRT calculation [45].

253 *S3.2 Reference pathogens and dose-response*

254 Of the human-infectious enteric viruses, bacteria and protozoa included in [42], we narrowed the list  
 255 to the dominant hazards (i.e., *Norovirus* and *Cryptosporidium* spp.). We selected commonly used dose-

256 response models that relate a healthy adult’s dose to a probability of infection based on ingestion (see [45]  
257 for more details). For *Norovirus* (doses in genome copies (gc)), two dose-response models were selected to  
258 represent the lower- and upper-bounds of predicted risk across the range of available models. The upper-  
259 bound, a hypergeometric model for disaggregated viruses [46], predicts relatively high risks among the  
260 available models in the relevant dose range. The lower-bound, a fractional Poisson model [47] predicts  
261 similar risks as the majority of the published *Norovirus* dose-response models with good empirical fit to the  
262 available data (reviewed in Abel et al. [48]). For *Cryptosporidium* spp. (doses in oocysts), we adopted an  
263 exponential model based on the U.S. EPA Long Term 2 Enhanced Surface Water Treatment Rule (LT2)  
264 Economic Analysis [49] and a fractional Poisson model [47], which results in risks that are much greater  
265 than previously predicted in the LT2. LRTs from the guidance document (Table 1) are based primarily on  
266 the lower-bound dose-response for *Norovirus* and the upper-bound for *Cryptosporidium* (Sharvelle et al.,  
267 2017).

### 268 S3.3 *Characterization of pathogens in waters*

269 We adopted previously simulated onsite graywater and wastewater pathogen concentrations [50],  
270 which used an epidemiology-based approach to describe distributions of pathogen concentrations. The  
271 epidemiological approach used data describing population illness rates (as a surrogate for infection) and  
272 pathogen shedding characteristics during an infection.

273 The mixed-use building (with a 1,100-person collection) was modeled using the pathogen  
274 concentration simulations from a reference 1,000-person residential building collection system (described  
275 in detail in [50]). This simplification was made since most of the collected water in the mixed-use system  
276 was from residential use and the difference in population size was small between the reference system and  
277 the mixed-use systems.

### 278 S3.4 *Pathogen treatment*

279 To provide a realistic estimate of risk, we accounted for variability in treatment performance for the  
280 MBR and ozone systems, for which pathogen (or surrogate) monitoring data was available (see Tables S16–  
281 18 for TP characterizations). Chlorine disinfection performance was set to the LRVs in Table S3 based on  
282 the available performance data which showed minimal variation [51,52]. For the RVFW and UV, we did  
283 not identify performance data to characterize performance probabilistically; rather, we used the LRVs in  
284 Table S3.

285 The MBR treatment performance was modeled as normal (described in [42]) based on a review of the  
286 literature on treatment performance for full scale AeMBR reclaimed water systems between 1992 and 2015  
287 [53]. We did not identify performance data for the AnMBR and assumed that performance was the same.  
288 For the ozone treatment performance, we adopted an inverse gaussian characterization based on  
289 performance measured over the course of one year at a direct potable reuse plant [51], but we shifted the  
290 mean to align with dosing requirements for non-potable treatment (while maintaining the same variance).

291 Although we did not model UV performance probabilistically, we included a sudden UV treatment  
292 failure event, which has been identified previously as a potential problem for finished water quality in  
293 potable reuse [51,52]. We modeled a 15-minute UV failure event (UV TP=0) during which poorly treated  
294 water mixes with stored, treated water and is consumed over the course of one day. This duration was  
295 selected based on previous work [51,52] and assumed that UV treatment failure triggers an alarm and  
296 garners a quick response in the form of a manual value close. We modelled the occurrence of a lamp or  
297 ballast failure as one event per year [51,54]. For comparison, we also separately modeled risk using the  
298 LRVs in Table S3 for indoor use (excluding the irrigation).

### 299 S3.5 *Treatment Performance*

300 Table S16. Variable Treatment Performance (TP) for Aerobic and Anaerobic MBRs: Mixed Wastewater and  
 301 Graywater<sup>a</sup>

| Unit Process | Virus                 | Protozoa              | Bacteria | Dose | Dose Units         |
|--------------|-----------------------|-----------------------|----------|------|--------------------|
| MBR          | N(5.6,1) <sup>b</sup> | N(5.0,0.65)           | n/a      | n/a  | n/a                |
| Ozone        | n/a                   | n/a                   | n/a      | n/a  | n/a                |
| UV           | 0                     | 4.0 or 0 <sup>c</sup> | n/a      | 30   | mJ/cm <sup>2</sup> |
| Chlorination | 4                     | 0                     | n/a      | 32   | mg-min/L           |

<sup>a</sup>Source: MBR [53], UV and chlorination [2]

<sup>b</sup> Where N denotes a normal distribution with parameters (mu,sigma)

<sup>c</sup> A LRT of 0 for 15 minutes for 1 day a year due to sudden lamp or ballast failure [51,54]

302 Table S17. Variable Treatment Performance (TP) for Recirculating Vertical Flow Wetland: Mixed  
 303 Wastewater<sup>a</sup>

| Unit Process | Virus                                  | Protozoa                               | Bacteria | Dose | Dose Units         |
|--------------|----------------------------------------|----------------------------------------|----------|------|--------------------|
| RVFW         | 0.5                                    | 1                                      | n/a      | n/a  | n/a                |
| Ozone        | Inverse Gaussian (mu=4.0, lambda=48.7) | Inverse Gaussian (mu=2.0, lambda=6.03) | n/a      | 8.3  | mg-min/L           |
| UV           | 1.0 or 0 <sup>b</sup>                  | 4.0 or 0 <sup>b</sup>                  | n/a      | 55   | mJ/cm <sup>2</sup> |
| Chlorination | 4                                      | 0                                      | n/a      | 32   | mg-min/L           |

<sup>a</sup>Source: RVFW, UV and Chlorination Guidance [2]

<sup>b</sup>A LRT of 0 for 15 minutes for 1 day a year due to sudden lamp or ballast failure (Pecson et al., 2017, Tng et al., 2015)

304 Table S18. Variable Treatment Performance (TP) for Recirculating Vertical Flow Wetland: Source-Separated  
 305 Graywater<sup>a</sup>

| Unit Process | Virus                 | Protozoa              | Bacteria | Dose | Dose Units         |
|--------------|-----------------------|-----------------------|----------|------|--------------------|
| RVFW         | 0.5                   | 1                     | n/a      | n/a  | n/a                |
| Ozone        | n/a                   | n/a                   | n/a      | n/a  | n/a                |
| UV           | 2.0 or 0 <sup>b</sup> | 4.0 or 0 <sup>b</sup> | n/a      | 95   | mJ/cm <sup>2</sup> |
| Chlorination | 4                     | 0                     | n/a      | 32   | mg-min/L           |

<sup>a</sup>Source: RVFW, UV and Chlorination [2]

306

307 **S4. LCCA Methods**

308 Direct cost factors listed in Table S19 were multiplied by unit process costs to estimate the cost of  
 309 integrating individual treatment processes within the larger wastewater treatment system. Indirect cost

310 factors listed in Table S20 were multiplied by the sum of unit process and direct costs to estimate the cost  
 311 of professional services, profit and contingency spending. Table S21 lists the estimated life span of  
 312 individual system components that determine the time of equipment replacement.

313 Table S19. Direct Cost Factors

| Direct Cost Elements        | Direct Cost Factor |
|-----------------------------|--------------------|
| Mobilization                | 0.05               |
| Site Preparation            | 0.07               |
| Site Electrical             | 0.15               |
| Yard Piping                 | 0.10               |
| Instrumentation and Control | 0.08               |

314

315 Table S20. Indirect Cost Factors

| Indirect Cost Elements | Indirect Cost Factor |
|------------------------|----------------------|
| Miscellaneous Costs    | 0.05                 |
| Legal Costs            | 0.02                 |
| Engineering Design Fee | 0.15                 |
| Inspection Costs       | 0.02                 |
| Contingency            | 0.10                 |
| Technical Services     | 0.02                 |
| Profit                 | 0.15                 |

316

Table S21. Estimated Lifespan of System Components

| Unit Process       | Component                    | Component Lifespan (years) |
|--------------------|------------------------------|----------------------------|
| Equalization Basin | Basin                        | 40                         |
|                    | Floating Aerator/Mixer       | 15                         |
| Fine Screen        | Screen Equipment             | 15                         |
| AeMBR              | Basin                        | 40                         |
|                    | Blowers                      | 15                         |
|                    | Diffuser Swing Arm           | 20                         |
|                    | Diffusers                    | 10                         |
|                    | Membrane                     | 10                         |
|                    | Permeate Pumps               | 25                         |
|                    | Sludge Pumps                 | 25                         |
| AnMBR              | Basin                        | 40                         |
|                    | Blower, Biogas Recirculation | 15                         |
|                    | Diffuser Swing Arm           | 20                         |
|                    | Diffusers                    | 10                         |
|                    | Floating Cover               | 40                         |
|                    | Gas Safety Equipment         | 15                         |
|                    | Membrane                     | 10                         |
|                    | Mixer                        | 15                         |

Table S21. Estimated Lifespan of System Components

| Unit Process                        | Component                   | Component Lifespan (years) |
|-------------------------------------|-----------------------------|----------------------------|
|                                     | Permeate Pumps              | 25                         |
|                                     | Sludge Pumps                | 25                         |
|                                     | Unit Piping                 | 50                         |
| Downflow Hanging Sponge             | Blower                      | 15                         |
|                                     | Sponge Media                | 10                         |
|                                     | Vessels                     | 40                         |
| Zeolite Adsorption System           | Feed System                 | 25                         |
|                                     | Vessel                      | 40                         |
|                                     | Zeolite Regeneration System | 15                         |
|                                     | Zeolite Replacement System  | 15                         |
| Recirculating Vertical Flow Wetland | Basins                      | 40                         |
|                                     | Gravel Media                | 40                         |
|                                     | Piping                      | 50                         |
|                                     | Pumps                       | 25                         |
| Slant Plate Clarifier               | Sludge Pump                 | 25                         |
|                                     | Unit                        | 40                         |
| UV                                  | Bulb                        | 1                          |
|                                     | Quartz Sleeve               | 5                          |
|                                     | Unit                        | 30                         |
| Chlorination                        | Chlorine Pump               | 25                         |
|                                     | Contact Basin               | 40                         |
| Ozone                               | Contact Basin               | 40                         |
|                                     | Monitoring Equipment        | 10                         |
|                                     | Ozone Generator             | 10                         |

317 Equation S1 presents the equation used to estimate interest costs during construction.

318 
$$I_c = \sum (\text{Unit Process Costs} + \text{Direct Costs} + \text{Indirect Costs}) \times T_{CP} \times \left(\frac{i_r}{2}\right)$$

319 Equation S1

320 Where:

321  $I_c$  (2016 \$) = Interest paid during construction

322 Unit Process Costs (2016 \$) = Total unit process equipment and installation cost

323 Direct Costs (2016 \$) = Total direct costs

324 Indirect Costs (2014 \$) = Indirect costs, including miscellaneous items, legal costs, engineering design fees, inspection costs, contingency and technical services

326  $T_{CP}$  = Construction period, 3 years based on CAPDETWorks™ default construction period (Hydromantis, 2014)

328  $i_r$  = Interest rate during construction, %

329

### 330 S5. LCA Methods

331 Acidification potential, eutrophication potential, and particulate matter formation potential were  
 332 assessed using U.S. EPA's Tool for the Reduction and Assessment of Chemical and Environmental Impacts  
 333 (TRACI) impact assessment method, version 2.1 [55,56]. Results for global warming potential (GWP)



334 category are characterized using factors reported by the Intergovernmental Panel on Climate Change  
 335 (IPCC) in 2013 with a 100-year time horizon [57]. Fossil fuel depletion potential (FDP) is based on the  
 336 heating value of the fossil fuel and according to the ReCiPe impact assessment method [58]. Cumulative  
 337 energy demand (CED) and water use (WU) are inventory indicators and not representative of potential end  
 338 impacts. CED assesses non-renewable energy extracted and renewable energy utilized. WU is calculated  
 339 as an inventory of consumptive freshwater withdrawals which are evaporated, incorporated into products  
 340 and waste, transferred to different watersheds, or disposed into the sea after usage.

Table S22. LCA Metrics

| Impact/Inventory Category                     | Description                                                                                                                                                                                                                                                                                                                                                                                                                                                  | Unit                            |
|-----------------------------------------------|--------------------------------------------------------------------------------------------------------------------------------------------------------------------------------------------------------------------------------------------------------------------------------------------------------------------------------------------------------------------------------------------------------------------------------------------------------------|---------------------------------|
| Acidification Potential (AP)                  | AP quantifies the acidifying effect of substances on their environment. Important emissions leading to terrestrial acidification include sulfur dioxide (SO <sub>2</sub> ), NO <sub>x</sub> and ammonia (NH <sub>3</sub> ). Results are characterized as kg SO <sub>2</sub> eq according to the TRACI impact assessment method.                                                                                                                              | kg SO <sub>2</sub> eq           |
| Cumulative Energy Demand (CED)                | The CED indicator accounts for the total usage of non-renewable fuels (natural gas, petroleum, coal and nuclear) and renewable fuels (such as biomass and hydro). Energy is tracked based on the higher heating value of the fuel utilized from point of extraction, with all energy values summed together and reported on a megajoule (MJ) basis (Hischier et al. 2010).                                                                                   | MJ                              |
| Eutrophication Potential (EP)                 | EP assesses the potential impacts from excessive loading of macro-nutrients to the environment and eventual deposition in freshwater and marine environments. Impacts were assessed according to the TRACI impact assessment method, which calculates a generic eutrophication potential impact that is not specific to either marine or freshwater environments. Both nitrogen and phosphorous compounds are expressed on an equivalent Nitrogen (N) basis. | kg N eq                         |
| Fossil Fuel Depletion Potential (FDP)         | FDP captures the consumption of fossil fuels, primarily coal, natural gas and crude oil. All fuels are standardized to kg oil eq based on the heating value of the fossil fuel, according to the ReCiPe impact assessment method.                                                                                                                                                                                                                            | kg oil eq                       |
| Global Warming Potential (GWP)                | The GWP impact category represents the heat trapping capacity of GHGs over a 100-year time horizon. All GHGs are characterized as kg carbon dioxide equivalents (CO <sub>2</sub> eq) according to the intergovernmental panel on climate change (IPCC) 2013 5th Assessment Report global warming potentials (IPCC 2013).                                                                                                                                     | kg CO <sub>2</sub> eq           |
| Water Use (WU)                                | The water use indicator accounts for use of freshwater resources abstracted from surface and groundwaters. Water use is an inventory indicator that does not reflect specifically consumptive uses.                                                                                                                                                                                                                                                          | m <sup>3</sup> H <sub>2</sub> O |
| Particulate Matter Formation Potential (PMFP) | PMFP results in health impacts such as effects on breathing and respiratory systems, damage to lung tissue and premature death (Goedkoop et al. 2013). Primary pollutants (including PM <sub>2.5</sub> ) and secondary pollutants (e.g., SO <sub>x</sub> and NO <sub>x</sub> ) leading to PM formation are characterized here as kg PM <sub>2.5</sub> eq based on the TRACI impact assessment method.                                                        | kg PM <sub>2.5</sub> eq         |

Table S22. LCA Metrics

| Impact/Inventory Category      | Description                                                                                                                                                                                                                                                                                                                                             | Unit                 |
|--------------------------------|---------------------------------------------------------------------------------------------------------------------------------------------------------------------------------------------------------------------------------------------------------------------------------------------------------------------------------------------------------|----------------------|
| Smog Formation Potential (SFP) | SFP results determine the formation of reactive substances that cause harm to human health and vegetation. Results are characterized here as kg of ozone (O <sub>3</sub> ) eq according to the TRACI impact assessment method. Some key emissions leading to SFP include CO, methane (CH <sub>4</sub> ), NO <sub>x</sub> , NMVOCs and SO <sub>x</sub> . | kg O <sub>3</sub> eq |

## 341 S6. Detailed Results

342 Tables S23 and S24 contain detailed QMRA results listing 95<sup>th</sup> percentile annual probability of infection  
 343 for each mixed wastewater and graywater treatment scenario for individual reference pathogens and  
 344 combined risk.

345 Table S23. 95<sup>th</sup> percentile annual probability of infection (ppy) for non-potable reuse including treatment  
 346 variability and selected failures<sup>a,b</sup>

| Reference hazard              | Scenario |            |         |            |
|-------------------------------|----------|------------|---------|------------|
|                               | WW MBR   | WW Wetland | GW MBR  | GW Wetland |
| 1 Cryptosporidium low         | 8.1E-07  | 1.2E-04    | 2.6E-09 | 1.6E-05    |
| 2 Cryptosporidium up          | 6.6E-06  | 1.0E-03    | 2.1E-08 | 1.2E-04    |
| 3 Norovirus low               | 3.9E-05  | 4.3E-05    | 3.0E-07 | 4.4E-05    |
| 4 Norovirus up                | 2.1E-02  | 2.4E-02    | 2.0E-04 | 2.4E-02    |
| Combined risk low (1,3)       | 4.2E-05  | 2.0E-04    | 3.2E-07 | 7.0E-05    |
| Combined risk mid-range (2,3) | 5.2E-05  | 1.1E-03    | 3.8E-07 | 2.0E-04    |
| Combined risk up (2,4)        | 2.1E-02  | 2.6E-02    | 2.0E-04 | 2.4E-02    |

347 <sup>a</sup>. Assumed 4×10<sup>-5</sup> L of water consumed per day for 365 days a year; 10<sup>-3</sup> L of water consumed per day for 50 days a  
 348 year; and 10% of the population ingesting 2 L per day for 1 day of the year

349 <sup>b</sup>. For combined risk, numbers in parentheses indicate the pathogen-specific risk used to calculate annual combined  
 350 risk, using the upper- (up) or lower- (low) bound dose-response

351 Table S24. 95<sup>th</sup> percentile annual probability of infection (ppy) for non-potable reuse using LRVs<sup>a,b</sup>

| Reference hazard        | Scenario |            |         |            |
|-------------------------|----------|------------|---------|------------|
|                         | WW MBR   | WW Wetland | GW MBR  | GW Wetland |
| 1 Cryptosporidium low   | 6.9E-08  | 7.3E-06    | 3.5E-10 | 3.7E-06    |
| 2 Cryptosporidium up    | 5.6E-07  | 6.0E-05    | 2.9E-09 | 3.1E-05    |
| 3 Norovirus low         | 2.2E-05  | 6.6E-06    | 8.5E-08 | 2.8E-05    |
| 4 Norovirus up          | 1.2E-02  | 4.1E-03    | 5.5E-05 | 1.5E-02    |
| Combined risk low (1,3) | 2.2E-05  | 1.4E-05    | 8.5E-08 | 3.2E-05    |
| Combined risk mix (2,3) | 2.2E-05  | 6.6E-05    | 8.8E-08 | 5.8E-05    |
| Combined risk up (2,4)  | 1.2E-02  | 4.2E-03    | 5.5E-05 | 1.5E-02    |

352 <sup>a</sup> Assumed 4×10<sup>-5</sup> L of water consumed per day for 365 days a year with 10% of the population ingesting 2 L per day  
 353 for 1 day of the year

354 b. For combined risk, numbers in parentheses indicate the pathogen-specific risk used to calculate annual combined  
 355 risk, using the upper- (up) or lower- (low) bound dose-response risk  
 356

357 Tables S25 and S26 list summary LCA results for mixed wastewater and graywater treatment systems,  
 358 respectively.

Table S25. Summary LCA Results for Mixed Wastewater Treatment Systems

| Impact Category                        | AeMBR    |               |                  | AnMBR        |            | RVFW     | Units                           |
|----------------------------------------|----------|---------------|------------------|--------------|------------|----------|---------------------------------|
|                                        | No T.R.  | Electric T.R. | Natural Gas T.R. | Intermittent | Continuous |          |                                 |
| Acidification Potential                | -5.40E-4 | -3.46E-3      | 9.50E-4          | 1.88E-3      | 2.43E-3    | -3.30E-4 | kg SO <sub>2</sub> eq           |
| Cumulative Energy Demand               | -1.80    | -32.3         | 5.41             | -4.94        | 0.743      | -0.441   | MJ                              |
| Eutrophication Potential               | 4.81E-3  | 4.64E-3       | 5.09E-3          | 5.12E-3      | 5.17E-3    | 4.99E-3  | kg N eq                         |
| Fossil Depletion Potential             | -0.039   | -0.464        | -0.257           | -0.098       | -0.019     | -0.024   | kg oil eq                       |
| Global Warming Potential               | 0.054    | -1.19         | -0.263           | 0.086        | 0.321      | -0.048   | kg CO <sub>2</sub> eq           |
| Particulate Matter Formation Potential | -5.29E-5 | -2.40E-4      | 8.63E-5          | 7.91E-5      | 1.20E-4    | -2.35E-6 | kg PM <sub>2.5</sub> eq         |
| Smog Formation Potential               | 2.77E-3  | -0.055        | 0.036            | 0.079        | 0.090      | 6.29E-3  | kg O <sub>3</sub> eq            |
| Water Use                              | -1.19    | -1.20         | -1.19            | -1.19        | -1.19      | -1.19    | m <sup>3</sup> H <sub>2</sub> O |

359

Table S26. Summary LCA Results for Graywater Treatment Systems

| Impact Category            | AeMBR    |               |                  | AnMBR        |            | RVFW     | Units                 |
|----------------------------|----------|---------------|------------------|--------------|------------|----------|-----------------------|
|                            | No T.R.  | Electric T.R. | Natural Gas T.R. | Intermittent | Continuous |          |                       |
| Acidification Potential    | -7.30E-4 | -3.84E-3      | 6.30E-4          | 1.60E-4      | 7.20E-4    | -6.00E-4 | kg SO <sub>2</sub> eq |
| Cumulative Energy Demand   | -3.68    | -36.3         | 2.07             | -4.84        | 0.953      | -2.84    | MJ                    |
| Eutrophication Potential   | 4.72E-3  | 4.53E-3       | 4.99E-3          | 4.88E-3      | 4.93E-3    | 4.85E-3  | kg N eq               |
| Fossil Depletion Potential | -0.064   | -0.518        | -0.308           | -0.087       | -6.03E-3   | -0.058   | kg oil eq             |
| Global Warming Potential   | -0.101   | -1.42         | -0.480           | -0.110       | 0.129      | -0.163   | kg CO <sub>2</sub> eq |

Table S26. Summary LCA Results for Graywater Treatment Systems

| Impact Category                        | AeMBR    |               |                  | AnMBR        |            | RVFW     | Units                           |
|----------------------------------------|----------|---------------|------------------|--------------|------------|----------|---------------------------------|
|                                        | No T.R.  | Electric T.R. | Natural Gas T.R. | Intermittent | Continuous |          |                                 |
| Particulate Matter Formation Potential | -6.55E-5 | -2.70E-4      | 6.60E-5          | -7.73E-6     | 2.91E-5    | -2.54E-5 | kg PM <sub>2.5</sub> eq         |
| Smog Formation Potential               | -9.50E-4 | -0.063        | 0.030            | 0.022        | 0.033      | 1.40E-3  | kg O <sub>3</sub> eq            |
| Water Use                              | -1.19    | -1.20         | -1.19            | -1.19        | -1.19      | -1.19    | m <sup>3</sup> H <sub>2</sub> O |

360

361

Table S27. Summary LCA Results for Graywater Treatment Systems

| System Type    | Thermal Recovery | Scenario | System Costs over 30 Year Lifespan |           |           |           |               |                            |                      |           |
|----------------|------------------|----------|------------------------------------|-----------|-----------|-----------|---------------|----------------------------|----------------------|-----------|
|                |                  |          | Electricity                        | Capital   | Materials | Labor     | Energy Offset | Centralized Treatment Cost | Avoided Utility Cost | Net NPV   |
| GW AeMBR       | None             | One      | 35,161                             | 1,231,889 | 285,099   | 1,653,523 | -             | 1,096,516                  | (1,254,056)          | 3,048,133 |
| GW AeMBR       | None             | Two      | 44,623                             | 1,473,988 | 305,428   | 1,767,678 | -             | 936,616                    | (1,630,273)          | 2,898,061 |
| GW AeMBR       | None             | Three    | 53,988                             | 1,703,919 | 326,297   | 1,866,863 | -             | 1,152,759                  | (1,880,325)          | 3,223,501 |
| GW AeMBR       | Electricity      | One      | 225,754                            | 1,289,927 | 293,791   | 1,662,215 | (349,321)     | 1,096,516                  | (1,254,056)          | 2,964,827 |
| GW AeMBR       | Electricity      | Two      | 292,394                            | 1,549,438 | 316,727   | 1,778,977 | (454,117)     | 936,616                    | (1,630,273)          | 2,789,763 |
| GW AeMBR       | Electricity      | Three    | 358,937                            | 1,796,780 | 340,204   | 1,880,770 | (558,913)     | 1,152,759                  | (1,880,325)          | 3,090,211 |
| GW AeMBR       | Natural Gas      | One      | 225,754                            | 1,289,927 | 293,791   | 1,662,215 | (123,219)     | 1,096,516                  | (1,254,056)          | 3,190,928 |
| GW AeMBR       | Natural Gas      | Two      | 292,394                            | 1,549,438 | 316,727   | 1,778,977 | (160,185)     | 936,616                    | (1,630,273)          | 3,083,694 |
| GW AeMBR       | Natural Gas      | Three    | 358,937                            | 1,796,780 | 340,204   | 1,880,770 | (197,151)     | 1,152,759                  | (1,880,325)          | 3,451,973 |
| Mixed WW AeMBR | None             | One      | 43,998                             | 832,501   | 254,483   | 1,664,916 | -             | 1,096,516                  | (1,258,578)          | 2,633,836 |
| Mixed WW AeMBR | None             | Two      | 56,111                             | 953,031   | 264,279   | 1,773,414 | -             | 936,616                    | (1,636,151)          | 2,347,299 |
| Mixed WW AeMBR | None             | Three    | 68,127                             | 1,061,156 | 275,014   | 1,866,740 | -             | 1,152,759                  | (1,887,560)          | 2,536,235 |
| Mixed WW AeMBR | Electricity      | One      | 239,598                            | 879,640   | 261,542   | 1,671,975 | (343,889)     | 1,096,516                  | (1,258,578)          | 2,546,804 |

Table S27. Summary LCA Results for Graywater Treatment Systems

| System Type    | Thermal Recovery | Scenario | System Costs over 30 Year Lifespan |           |           |           |               |                            |                      |           |
|----------------|------------------|----------|------------------------------------|-----------|-----------|-----------|---------------|----------------------------|----------------------|-----------|
|                |                  |          | Electricity                        | Capital   | Materials | Labor     | Energy Offset | Centralized Treatment Cost | Avoided Utility Cost | Net NPV   |
| Mixed WW AeMBR | Electricity      | Two      | 310,391                            | 1,014,311 | 273,456   | 1,782,591 | (447,056)     | 936,616                    | (1,636,151)          | 2,234,158 |
| Mixed WW AeMBR | Electricity      | Three    | 381,087                            | 1,136,578 | 286,309   | 1,878,035 | (550,223)     | 1,152,759                  | (1,887,560)          | 2,396,984 |
| Mixed WW AeMBR | Natural Gas      | One      | 239,598                            | 879,640   | 261,542   | 1,671,975 | (121,303)     | 1,096,516                  | (1,258,578)          | 2,769,390 |
| Mixed WW AeMBR | Natural Gas      | Two      | 310,391                            | 1,014,311 | 273,456   | 1,782,591 | (157,694)     | 936,616                    | (1,636,151)          | 2,523,520 |
| Mixed WW AeMBR | Natural Gas      | Three    | 381,087                            | 1,136,578 | 286,309   | 1,878,035 | (194,085)     | 1,152,759                  | (1,887,560)          | 2,753,122 |
| GW RVF         | None             | One      | 37,507                             | 1,428,279 | 108,836   | 1,896,965 | -             | 1,096,516                  | (1,254,056)          | 3,314,047 |
| GW RVF         | None             | Two      | 42,969                             | 1,751,480 | 129,927   | 2,023,241 | -             | 936,616                    | (1,630,273)          | 3,253,960 |
| GW RVF         | None             | Three    | 64,012                             | 2,077,401 | 150,930   | 2,136,575 | -             | 1,152,759                  | (1,880,325)          | 3,701,352 |
| Mixed WW RVF   | None             | One      | 48,771                             | 1,107,654 | 63,069    | 2,305,142 | -             | 1,096,516                  | (1,258,578)          | 3,362,575 |
| Mixed WW RVF   | None             | Two      | 56,378                             | 1,339,783 | 70,564    | 2,421,086 | -             | 936,616                    | (1,636,151)          | 3,188,276 |
| Mixed WW RVF   | None             | Three    | 79,566                             | 1,565,766 | 77,708    | 2,523,578 | -             | 1,152,759                  | (1,887,560)          | 3,511,816 |
| GW AnMBR       | None             | One      | 51,755                             | 1,737,043 | 390,436   | 1,847,523 | (7,875)       | 1,096,516                  | (1,254,056)          | 3,861,342 |
| GW AnMBR       | None             | Two      | 67,833                             | 2,044,487 | 425,215   | 1,983,161 | (10,238)      | 936,616                    | (1,630,273)          | 3,816,802 |

Table S27. Summary LCA Results for Graywater Treatment Systems

| System Type    | Thermal Recovery | Scenario | System Costs over 30 Year Lifespan |           |           |           |               |                            |                      |           |
|----------------|------------------|----------|------------------------------------|-----------|-----------|-----------|---------------|----------------------------|----------------------|-----------|
|                |                  |          | Electricity                        | Capital   | Materials | Labor     | Energy Offset | Centralized Treatment Cost | Avoided Utility Cost | Net NPV   |
| GW AnMBR       | None             | Three    | 84,288                             | 2,335,166 | 460,110   | 2,101,111 | (12,600)      | 1,152,759                  | (1,880,325)          | 4,240,507 |
| Mixed WW AnMBR | None             | One      | 49,635                             | 1,456,476 | 384,154   | 1,823,172 | (11,568)      | 1,096,516                  | (1,258,578)          | 3,539,807 |
| Mixed WW AnMBR | None             | Two      | 63,845                             | 1,652,476 | 416,224   | 1,949,876 | (15,039)      | 936,616                    | (1,636,151)          | 3,367,847 |
| Mixed WW AnMBR | None             | Three    | 78,398                             | 1,830,731 | 448,415   | 2,058,725 | (18,509)      | 1,152,759                  | (1,887,560)          | 3,662,959 |
| GW AnMBR       | None             | One      | 31,896                             | 1,737,043 | 390,436   | 1,847,523 | (7,875)       | 1,096,516                  | (1,254,056)          | 3,841,482 |
| GW AnMBR       | None             | Two      | 40,833                             | 2,044,487 | 425,215   | 1,983,161 | (10,238)      | 936,616                    | (1,630,273)          | 3,789,802 |
| GW AnMBR       | None             | Three    | 49,826                             | 2,335,166 | 460,110   | 2,101,111 | (12,600)      | 1,152,759                  | (1,880,325)          | 4,206,046 |
| Mixed WW AnMBR | None             | One      | 31,577                             | 1,456,476 | 384,154   | 1,823,172 | (11,568)      | 1,096,516                  | (1,258,578)          | 3,521,749 |
| Mixed WW AnMBR | None             | Two      | 39,295                             | 1,652,476 | 416,224   | 1,949,876 | (15,039)      | 936,616                    | (1,636,151)          | 3,343,297 |
| Mixed WW AnMBR | None             | Three    | 47,063                             | 1,830,731 | 448,415   | 2,058,725 | (18,509)      | 1,152,759                  | (1,887,560)          | 3,631,625 |

364 **References**

- 365 1. Bastian, R.; Murray, D. *2012 Guidelines for Water Reuse*; U.S. EPA Office of Research and Development:  
 366 Washington D.C., 2012;
- 367 2. Sharvelle, S.; Ashbolt, N.; Clerico, E.; Hultquist, R.; Leverenz, H.; Olivieri, A. *Risk-Based Framework for*  
 368 *the Development of Public Health Guidance for Decentralized Non-Potable Water Systems*; 2017; ISBN 978-  
 369 1-941242-83-4.
- 370 3. Cote, P.; Alam, Z.; Penny, J. Hollow fiber membrane life in membrane bioreactors (MBR). *Desalination*  
 371 **2012**, 288, 145–151, doi:10.1016/j.desal.2011.12.026.
- 372 4. Suez Z-MOD L Packaged Plants: MBR Platform Systems Featuring LEAPmbr Technology 2017.
- 373 5. Yoon, S.-H. *Membrane Bioreactor Processes*; CRC Press: Boca Raton, Florida, 2016;
- 374 6. Best, G. Personal Communication Graham Best, GE Power, Water Regional Sales Manager. **2015**.
- 375 7. IPCC *IPCC Guidelines for National Greenhouse Gas Inventories*; Intergovernmental Panel on Climate  
 376 Change, National Greenhouse Gas Inventories Programme: IGES, Japan, 2006; ISBN 4-88788-032-4.
- 377 8. Mai, D.T.; Kunacheva, C.; Stuckey, D.C. A review of posttreatment technologies for anaerobic  
 378 effluents for discharge and recycling of wastewater. *Critical Reviews in Environmental Science and*  
 379 *Technology* **2018**, 48, 167–209, doi:10.1080/10643389.2018.1443667.
- 380 9. Boyjoo, Y.; Pareek, V.K.; Ang, M. A review of greywater characteristics and treatment processes.  
 381 *Water Science and Technology* **2013**, 67, 1403–1424, doi:10.2166/wst.2013.675.
- 382 10. Eriksson, E.; Auffarth, K.; Henze, M.; Ledin, A. Characteristics of grey wastewater. *Urban Water* **2002**,  
 383 4, 85–104, doi:10.1016/S1462-0758(01)00064-4.
- 384 11. Ghaitidak, D.M.; Yadav, K.D. Characteristics and treatment of greywater—a review. *Environ Sci Pollut*  
 385 *Res* **2013**, 20, 2795–2809, doi:10.1007/s11356-013-1533-0.
- 386 12. Li, F.; Wichmann, K.; Otterpohl, R. Review of the technological approaches for grey water treatment  
 387 and reuses. *Science of the Total Environment* **2009**, 407, 3439–3449, doi:10.1016/j.scitotenv.2009.02.004.
- 388 13. Metcalf & Eddy; Tchobanoglous, G.; Burton, F. L.; Stensel, H. D.; Tsuchihashi, R. *Wastewater*  
 389 *Engineering: Treatment and Reuse*; 5th ed.; McGraw-Hill: Boston, MA, 2014;
- 390 14. Feickert, C.A.; Guy, K.; Page, M. *Energy Balance Calculations for an Anaerobic Membrane Bioreactor*;  
 391 Washington, D.C., 2012; pp. 1–30;.
- 392 15. Chang, S. Anaerobic Membrane Bioreactors (AnMBR) for Wastewater Treatment. *Advances in*  
 393 *Chemical Engineering and Science* **2014**, 04, 56–61, doi:10.4236/aces.2014.41008.
- 394 16. Lew, B.; Tarre, S.; Beliavski, M.; Dosoretz, C.; Green, M. Anaerobic membrane bioreactor (AnMBR)  
 395 for domestic wastewater treatment. *Desalination* **2009**, 243, 251–257, doi:10.1016/j.desal.2008.04.027.
- 396 17. Ho, J.; Sung, S. Methanogenic activities in anaerobic membrane bioreactors (AnMBR) treating  
 397 synthetic municipal wastewater. *Bioresource Technology* **2010**, 101, 2191–2196,  
 398 doi:10.1016/j.biortech.2009.11.042.
- 399 18. Ho, J.; Sung, S. Anaerobic Membrane Bioreactor Treatment of Synthetic Municipal Wastewater at  
 400 Ambient Temperature. *Water Environment Research* **2009**, 81, 922–928, doi:10.2175/106143009X407339.
- 401 19. Martinez-Sosa, D.; Helmreich, B.; Netter, T.; Paris, S.; Bischof, F.; Horn, H. Anaerobic submerged  
 402 membrane bioreactor (AnSMBR) for municipal wastewater treatment under mesophilic and  
 403 psychrophilic temperature conditions. *Bioresource Technology* **2011**, 102, 10377–10385,  
 404 doi:10.1016/j.biortech.2011.09.012.
- 405 20. UNFCCC *Clean Development Mechanism: Methodological Tool, Project and leakage emissions from anaerobic*  
 406 *digestion*; CDM Methodology; 2012; p. 11;.



- 407 21. Christian, S.; Grant, S.; Wilso, D.; McCarthy, P.; Mills, D.; Kolakowski, M. The first two years of full-  
408 scale anaerobic membrane bioreactor operation treating high strength wastewater at Kens Foods Inc.  
409 *WEF Conference Proceedings* **2010**, 4019–4033.
- 410 22. Matsuura, N.; Hatamoto, M.; Sumino, H.; Syutsubo, K.; Yamaguchi, T.; Ohashi, A. Recovery and  
411 biological oxidation of dissolved methane in effluent from UASB treatment of municipal sewage  
412 using a two-stage closed downflow hanging sponge system. *Journal of Environmental Management*  
413 **2015**, *151*, 200–209, doi:10.1016/j.jenvman.2014.12.026.
- 414 23. Deng, Q.; Dhar, B.R.; Elbeshbishy, E.; Lee, H.S. Ammonium nitrogen removal from the permeates of  
415 anaerobic membrane bioreactors: Economic regeneration of exhausted zeolite. *Environmental*  
416 *Technology (United Kingdom)* **2014**, *35*, 2008–2017, doi:10.1080/09593330.2014.889759.
- 417 24. Gross, A.; Shmueli, O.; Ronen, Z.; Raveh, E. Recycled vertical flow constructed wetland (RVFCW) –  
418 a novel method of recycling greywater for irrigation in small communities and households.  
419 *Chemosphere* **2007**, *66*, 916–923.
- 420 25. Sklarz, M.Y.; Gross, A.; Soares, M.I.M.; Yakirevich, A. Mathematical model for analysis of  
421 recirculating vertical flow constructed wetlands. *Water Research* **2010**, *44*,  
422 doi:10.1016/j.watres.2009.12.011.
- 423 26. Alfiya, Y.; Gross, A.; Sklarz, M.; Friedler, E. Reliability of on-site greywater treatment systems in  
424 Mediterranean and arid environments - A case study. *Water Science and Technology* **2013**, *67*, 1389–  
425 1395, doi:10.2166/wst.2013.687.
- 426 27. Gross, A.; Kaplan, D.; Baker, K. Removal of chemical and microbiological contaminants from  
427 domestic greywater using a recycled vertical flow bioreactor (RVFB). *Ecological Engineering* **2007**, *32*,  
428 107–114, doi:10.1016/j.ecoleng.2007.06.006.
- 429 28. Teiter, S.; Mander, U. Emission of greenhouse gases from constructed wetlands for wastewater  
430 treatment and from riparian buffer zones. *Ecological Engineering2* **2005**, *25*, 528–541,  
431 doi:10.1016/j.ecoleng.2005.07.011.
- 432 29. Atlantic UV Corp. Sanitron® Ultraviolet Water Purifiers. **2007**, 1–10.
- 433 30. Primozone® Primozone® GM1-GM2-GM3 - high concentration ozone generators with compact  
434 design. **2014**, 1–2.
- 435 31. Lenntech Ozone decomposition 2018.
- 436 32. Kahraman, A.; Çelebi, A. Investigation of the performance of a heat pump using waste water as a  
437 heat source. *Energies* **2009**, *2*, 697–713, doi:10.3390/en20300697.
- 438 33. Cipolla, S.S.; Maglionico, M. Heat recovery from urban wastewater: Analysis of the variability of flow  
439 rate and temperature in the sewer of Bologna, Italy. *Energy Procedia* **2014**, *45*, 288–297,  
440 doi:10.1016/j.egypro.2014.01.031.
- 441 34. Greening, B.; Azapagic, A. Domestic heat pumps: Life cycle environmental impacts and potential  
442 implications for the UK. *Energy* **2012**, *39*, 205–217, doi:10.1016/j.energy.2012.01.028.
- 443 35. Morelli, B.; Cashman, S.; Ma, Cissy; Garland, Jay; Bless, Diana; Jahne, Michael *Life Cycle Assessment*  
444 *and Cost Analysis of Distributed Mixed Wastewater and Graywater Treatment for Water Recycling in the*  
445 *Context of an Urban Case Study*; U.S. Environmental Protection Agency: Cincinnati, OH, 2019; p. 162;.
- 446 36. Cashman, S.; Gaglione, A.; Mosley, J.; Weiss, L.; Ashbolt, N.; Hawkins, T.; Cashdollar, J.; Xue, X.; Ma,  
447 C.; Arden, S. *Environmental and cost life cycle assessment of disinfection options for municipal drinking water*  
448 *treatment*; Washington, D.C., 2014;
- 449 37. Xue, X.; Cashman, S.; Gaglione, A.; Mosley, J.; Weiss, L.; Ma, X.C.; Cashdollar, J.; Garland, J. Holistic  
450 analysis of urban water systems in the Greater Cincinnati region: (1) life cycle assessment and cost  
451 implications. *Water Research X* **2019**, *2*, 100015, doi:10.1016/j.wroa.2018.100015.
- 452 38. Hendrickson, T.P.; Nguyen, M.T.; Sukardi, M.; Miot, A.; Horvath, A.; Nelson, K.L. Life-Cycle Energy  
453 Use and Greenhouse Gas Emissions of a Building-Scale Wastewater Treatment and Nonpotable  
454 Reuse System. *Environ. Sci. Technol.* **2015**, *49*, 10303–10311, doi:10.1021/acs.est.5b01677.

- 455 39. Beveridge, J. Domestic Water System Design for High-rise Buildings. *Plumbing Systems & Design* **2007**,  
456 40–45.
- 457 40. Harris, R.W.; Cullinane, M.J.; Sun, P.T. *Process Design and Cost Estimating Algorithms for the Computer*  
458 *Assisted Procedure for Design and Evaluation of Wastewater Treatment Systems (CAPDET)*; U.S.  
459 Environmental Protection Agency: Washington, D.C., 1982; p. 1700;.
- 460 41. DeOreo, W.B.; Mayer, P.W.; Dziegielewski, B.; Kiefer, J. *Residential End Uses of Water, Version 2*;  
461 Denver, CO, 2016;
- 462 42. Schoen, M.E.; Jahne, M.A.; Garland, J. Human health impact of non-potable reuse of distributed  
463 wastewater and greywater treated by membrane bioreactors. *Microbial Risk Analysis* **2018**, *9*, 72–81,  
464 doi:10.1016/j.mran.2018.01.003.
- 465 43. Dziegielewski, B.; Kiefer, J.C.; Opitz, E.M.; Porter, G.A.; Lantz, G.L.; DeOreo, W.B.; Mayer, P.W.;  
466 Nelson, J.O. *Commercial and Institutional End Uses of Water*; 2000; pp. 298–298;.
- 467 44. NRMHC; EPHC; AHMC *Australian Guidelines for Water Recycling: Managing Health and Environmental*  
468 *Risk (Phase 1)*; Natural Resource Management Ministerial Council, Environmental Protection and  
469 Heritage Council, Australian Health Ministers' Conference, 2006;
- 470 45. Schoen, M.E.; Ashbolt, N.J.; Jahne, M.A.; Garland, J. Risk-based enteric pathogen reduction targets  
471 for non-potable and direct potable use of roof runoff, stormwater, and greywater. *Microbial Risk*  
472 *Analysis* **2017**, *5*, 32–43, doi:10.1016/j.mran.2017.01.002.
- 473 46. Teunis, P.F.M.; Moe, C.L.; Liu, P.; Miller, S.E.; Lindesmith, L.; Baric, R.S.; Pendu, J.L.; Calderon, R.L.  
474 Norwalk virus: How infectious is it? *Journal of Medical Virology* **2008**, *80*, 1468–1476,  
475 doi:10.1002/jmv.21237.
- 476 47. Messner, M.J.; Berger, P. Cryptosporidium Infection Risk: Results of New Dose-Response Modeling.  
477 *Risk Analysis* **2016**, *36*, 1969–1982, doi:10.1111/risa.12541.
- 478 48. Abel, N.V.; Schoen, M.E.; Kissel, J.C.; Meschke, J.S. Comparison of Risk Predicted by Multiple  
479 Norovirus Dose–Response Models and Implications for Quantitative Microbial Risk Assessment. *Risk*  
480 *Analysis* **2017**, *37*, 245–264, doi:10.1111/risa.12616.
- 481 49. U.S. EPA *Occurrence and Exposure Assessment for the Final Long Term 2 Enhanced Surface Water Treatment*  
482 *Rule*; U.S. Environmental Protection Agency: Washington, D.C., 2005;
- 483 50. Jahne, M.A.; Schoen, M.E.; Garland, J.L.; Ashbolt, N.J. Simulation of enteric pathogen concentrations  
484 in locally-collected greywater and wastewater for microbial risk assessments. *Microbial Risk Analysis*  
485 **2017**, *5*, 44–52, doi:10.1016/j.mran.2016.11.001.
- 486 51. Pecson, B.M.; Triolo, S.C.; Olivieri, S.; Chen, E.C.; Pisarenko, A.N.; Yang, C.-C.; Olivieri, A.; Haas,  
487 C.N.; Trussell, R.S.; Trussell, R.R. Reliability of pathogen control in direct potable reuse: Performance  
488 evaluation and QMRA of a full-scale 1 MGD advanced treatment train. *Water Research* **2017**, *122*, 258–  
489 268, doi:10.1016/j.watres.2017.06.014.
- 490 52. Soller, J.A.; Parker, A.M.; Salveson, A. Public Health Implications of Short Duration, Off-Specification  
491 Conditions at Potable Reuse Water Treatment Facilities. *Environ. Sci. Technol. Lett.* **2018**, *5*, 675–680,  
492 doi:10.1021/acs.estlett.8b00470.
- 493 53. Branch, A. Validation of membrane bioreactors for water recycling 2016.
- 494 54. Tng, K., H.; Currie, J.; Roberts, C.; Koh, S.H.; Audley, M.; Leslie, G.L. *Resilience of Advanced Water*  
495 *Treatment Plants for Potable Reuse*; 2015;
- 496 55. Bare, J. TRACI 2.0: The Tool for the Reduction and Assessment of Chemical and other Environmental  
497 Impacts. *Clean Technologies and Environmental Policy* **2011**, *13*, 687–696, doi:10.1007/s10098-010-0338-9.
- 498 56. Bare, J.; Norris, G.A.; Pennington, D.W.; McKone, T. TRACI: The Tool for the Reduction and  
499 Assessment of Chemical and other Environmental Impacts. *Journal of Industrial Ecology* **2002**, *6*, 49–78,  
500 doi:10.1162/108819802766269539.

- 501 57. IPCC *Climate Change 2013: The Physical Science Basis. Contribution of Working Group I to the Fifth*  
502 *Assessment Report of the Intergovernmental Panel on Climate Change*; Cambridge University Press:  
503 Cambridge, UK and New York, NY, 2013;
- 504 58. Huijbregts, M.A.J.; Steinmann, Z.J.N.; Elshout, P.M.F.; Stam, G.; Verones, F.; Vieira, M.; Zijp, M.;  
505 Hollander, A.; van Zelm, R. ReCiPe2016: a harmonised life cycle impact assessment method at  
506 midpoint and endpoint level. *Int J Life Cycle Assess* **2017**, *22*, 138–147, doi:10.1007/s11367-016-1246-y.  
507
